1 **CTCF Mediates Dosage and Sequence-context-dependent Transcriptional**  
2 **Insulation through Formation of Local Chromatin Domains**

3

4 Hui Huang<sup>1,2</sup>, Quan Zhu<sup>3</sup>, Adam Jussila<sup>1,4</sup>, Yuanyuan Han<sup>3</sup>, Bogdan Bintu<sup>5</sup>, Colin Kern<sup>3</sup>, Mattia  
5 Conte<sup>6</sup>, Yanxiao Zhang<sup>1</sup>, Simona Bianco<sup>6</sup>, Andrea Chiariello<sup>6</sup>, Miao Yu<sup>1</sup>, Rong Hu<sup>1</sup>, Ivan Juric<sup>7</sup>,  
6 Ming Hu<sup>7</sup>, Mario Nicodemi<sup>6,8,9</sup>, Xiaowei Zhuang<sup>5</sup>, Bing Ren<sup>1,3,10\*</sup>

7

8 <sup>1</sup> Ludwig Institute for Cancer Research, La Jolla, California 92093, USA

9 <sup>2</sup> University of California, San Diego, Biomedical Sciences Graduate Program, La Jolla,  
10 California 92093, USA

11 <sup>3</sup> University of California, San Diego School of Medicine, Department of Cellular and Molecular  
12 Medicine, Center for Epigenomics, 9500 Gilman Drive, La Jolla, CA 92093-0653, USA

13 <sup>4</sup> Bioinformatics and Systems Biology Graduate Program, University of California San Diego, La  
14 Jolla, CA 92093, USA

15 <sup>5</sup> Howard Hughes Medical Institute, Department of Chemistry and Chemical Biology and  
16 Department of Physics, Harvard University, Cambridge, MA 02138, USA

17 <sup>6</sup> Dipartimento di Fisica, Università di Napoli Federico II, and INFN Napoli, Complesso di Monte  
18 Sant'Angelo, Naples, Italy

19 <sup>7</sup> Department of Quantitative Health Sciences, Lerner Research Institute, Cleveland Clinic  
20 Foundation, Cleveland, OH 44195, USA

21 <sup>8</sup> Berlin Institute for Medical Systems Biology, Max Delbrück Centre (MDC) for Molecular  
22 Medicine, Berlin, Germany.

23 <sup>9</sup> Berlin Institute of Health (BIH), Berlin, Germany

24 <sup>10</sup> University of California, San Diego School of Medicine, Department of Cellular and Molecular  
25 Medicine, Institute of Genomic Medicine, and Moores Cancer Center, 9500 Gilman Drive, La  
26 Jolla, CA 92093-0653, USA

27 \*Correspondence: [biren@health.ucsd.edu](mailto:biren@health.ucsd.edu)

28

29 **Keywords:** Insulators, CTCF binding sites, TAD boundary, Single chromosome imaging

30

31 **Abstract:**

32 Insulators play a critical role in spatiotemporal gene expression in metazoans by  
33 separating active and repressive chromatin domains and preventing inappropriate  
34 enhancer-promoter contacts. The evolutionarily conserved CCCTC-binding factor  
35 (CTCF) is required for insulator function in mammals, but not all of its binding sites act  
36 as insulators. Here, we explore the sequence requirements of CTCF-mediated  
37 transcriptional insulation with the use of a sensitive insulator reporter assay in mouse  
38 embryonic stem cells. We find that insulation potency depends on the number of CTCF  
39 binding sites in tandem. Furthermore, CTCF-mediated insulation is dependent on DNA  
40 sequences flanking its core binding motifs, and CTCF binding sites at topologically  
41 associating domain(TAD) boundaries are more likely to function as insulators than those  
42 outside TAD boundaries, independent of binding strength. Using chromosomal  
43 conformation capture assays and high-resolution chromatin imaging techniques, we  
44 demonstrate that insulators form local chromatin domain boundaries and reduce  
45 enhancer-promoter contacts. Taken together, our results provide strong genetic,  
46 molecular, and structural evidence connecting chromatin topology to the action of  
47 insulators in the mammalian genome.

48

49

50

51

52 **Introduction:**

53 The spatial and temporal patterns of gene expression are encoded in the genome  
54 sequences in the form of cis-regulatory elements which are categorized into promoters,  
55 enhancers, insulators, and other less-studied regulatory sequences, including  
56 repressive/silencing elements<sup>1-3</sup>. In metazoans, insulators play an essential role in cell-  
57 type-specific gene expression by protecting genes from improper regulatory signals  
58 from the neighboring chromatin environment<sup>4</sup>. One class of insulators acts as barriers to  
59 heterochromatin spreading<sup>5</sup>, while the other blocks enhancer-promoter  
60 communications<sup>6</sup>. Enhancer-blocking (EB) insulators act in a position-dependent  
61 manner in that they prevent enhancer-dependent gene activation only when placed in  
62 between the enhancer and target gene<sup>6-8</sup>. Insulators were initially identified in  
63 *Drosophila*, where the molecular machinery for insulation was first elucidated<sup>4, 6, 9</sup>. The  
64 first identified enhancer-blocking insulator in vertebrates is the 5'-HS4 element of the  
65 chicken  $\beta$ -globin locus<sup>10</sup>. Detailed analysis of this insulator led to the finding that the  
66 evolutionarily conserved zinc-finger family transcription factor CTCF, first identified as  
67 DNA binding protein at the chicken *c-Myc* gene promoter<sup>11</sup>, was essential for its  
68 enhancer-blocking activity<sup>12</sup>. Mutations in the CTCF protein or its binding sites at  
69 insulators have since been implicated in a broad spectrum of human diseases<sup>13-15</sup>. In  
70 addition to its function at insulators, CTCF has also been demonstrated to play roles in  
71 transcriptional repression, gene activation, alternative splicing, and class switch  
72 recombination depending on the context of genomic locus<sup>11, 16-20</sup>. There are reports that  
73 CTCF binding at gene promoters could promote, instead of block, enhancer-promoter  
74 interactions<sup>21, 22</sup>. To date, exactly how and where CTCF mediates insulator function

75 remains unclear.

76

77 CTCF has long been postulated to function as an organizer of the three-dimensional  
78 chromosome architecture<sup>1, 23, 24</sup>. Genome-wide chromosome conformation capture  
79 analyses showed that the interphase chromosomes in mammalian cells are partitioned  
80 into megabase-sized topologically associating domains (TADs)<sup>25, 26</sup>, and the binding  
81 sites for CTCF were found at over 75% of TAD boundaries<sup>25</sup>, suggesting a probable link  
82 between TAD boundaries and CTCF-mediated transcriptional insulation. Supporting this  
83 connection, disruption of TAD boundaries has been shown to permit ectopic enhancer-  
84 promoter contacts and aberrant gene expression, thereby leading to developmental  
85 abnormalities and cancer<sup>17, 27</sup>. Additionally, depletion of CTCF can lead to the  
86 weakening or disappearance of TADs<sup>28-30</sup>. CTCF drives TAD formation by working  
87 together with the cohesin complex to establish dynamic chromatin loops between  
88 distant CTCF binding sites, likely through a loop-extrusion process<sup>30-40</sup> or other  
89 mechanisms such as phase separation<sup>41-46</sup>. However, it is still debated whether TAD  
90 boundaries are sufficient to provide transcriptional insulation. Rapidly dissolving the  
91 global TAD structure by acute depletion of CTCF or cohesin subunits only altered  
92 transcription of a small number of genes in many different cellular contexts<sup>28, 30, 34, 36, 38,</sup>  
93 <sup>47</sup>. Moreover, deletion of CTCF sites at the developmental gene *Sox9-Kcnj2* TAD  
94 boundary did not cause discernible phenotypes<sup>48</sup>. Furthermore, a majority of CTCF  
95 binding sites are not located at TAD boundaries, and whether these CTCF sites may  
96 function as insulators is unclear. These observations warrant an in-depth investigation  
97 of the role that CTCF and TADs play in transcriptional insulation.

98

99 To better understand where and how CTCF may mediate transcriptional insulation in  
100 the genome, we have developed an insulator reporter assay to evaluate the function of  
101 any DNA fragments in blocking enhancer-dependent transcriptional activation in mouse  
102 embryonic stem (mES) cells. Using this system, we demonstrated that isolated single  
103 CTCF sites have weak or no insulator activity, regardless of its DNA binding strength as  
104 measured via biochemical assays. Instead, multiple copies of CTCF sites placed in  
105 tandem can provide a potent insulation effect. We also observed that CTCF binding  
106 sites at TAD boundaries could function as potent insulators, while the CTCF sites not  
107 located at TAD boundaries were incapable of insulating transcription. We attributed this  
108 difference in insulation activity to sequences immediately flanking the CTCF core motifs.  
109 We further discovered that insulators act by forming local TAD boundaries to reduce  
110 long-range enhancer-promoter contacts, using both chromosome conformation capture  
111 assays and high throughput multiplexed DNA fluorescence *in situ* hybridization (FISH)  
112 techniques. These results, taken together, shed new light on how CTCF mediates  
113 transcriptional insulation in mammalian cells and establish a direct link between TAD  
114 boundaries and insulators.

115

116

117

118

119

120

121 **Results:**

122

123 **A sensitive insulator reporter assay in mouse embryonic stem cells**

124

125 To quantitatively assay insulator activities in the context of native chromatin in cells, we  
126 engineered the *Sox2* gene locus in the F123 mES cell line, which was derived from a  
127 hybrid F1 mouse progeny (*Mus musculus castaneus* × *S129/SvJae*)<sup>49</sup>. We and others  
128 previously showed that a super-enhancer located ~110kb downstream of the *Sox2* gene  
129 was responsible for over 90% of its expression in the mES cells<sup>50, 51</sup>. We reasoned that  
130 insulator activity of DNA elements could be measured by the reduction in *Sox2* gene  
131 expression when inserted between the *Sox2* gene and the downstream super-enhancer.  
132 Therefore, we first tagged the two copies of the *Sox2* gene with *egfp* (CAST allele) and  
133 *mCherry* (129 allele) to quantify allelic *Sox2* expression by live-cell fluorescence-  
134 activated cell sorting (FACS) (Fig. 1a, Extended Data Fig. 1a). Subsequently, we  
135 inserted a suicidal fusion gene Tg(CAG-*HyTK*) flanked by a pair of heterotypic Flippase  
136 recognition sites (*Frt/F3*) between the *Sox2* gene and its downstream super-enhancer  
137 (*SE*) on the CAST allele (Fig. 1a, Extended Data Fig. 1b). As enhancer-blocking  
138 insulation is position-dependent, we created a control clone with the same replaceable  
139 cassette placed further downstream of the *Sox2* super-enhancer at equal distance on  
140 the CAST allele (Fig. 1a, Extended Data Fig. 1c). The suicidal marker gene can be  
141 replaced by a donor sequence using the recombinase mediated cassette exchange  
142 (RMCE) strategy (Fig. 1b, Extended Data Fig. 2a). By killing off unmodified mES cells  
143 with ganciclovir, we could achieve nearly 100% efficiency of marker-free insertion  
144 (Extended Data Fig. 2b).

145

146 As the insertion was specifically on the CAST allele, we used the 129 allele as the  
147 internal control to correct clone-to-clone variations in *Sox2* expression (Fig. 1b,  
148 Extended Data Fig. 3a-b), which allowed quantitative comparisons of insulator activities  
149 of different CTCF binding sites (CBSs). We tested the insulation activity of a total of 11  
150 different CBSs selected from several known TAD boundaries and chromatin loop  
151 anchors (Supplementary Table1). Each CBS insert was amplified from mouse or human

152 genomic DNA by PCR and was 1-4kb in length. Surprisingly, isolated single CBS tested  
153 in both the forward and reverse orientations generally exhibited little or no insulator  
154 effect (Fig. 1c). Only two of the probed CBSs in reverse orientation and four of the  
155 probed CBSs in forward orientation showed significant yet modest insulator effects (Fig.  
156 1c). The CBS of a canonical insulator, the HS5 sequence of the human beta-globin  
157 locus, reduced Sox2 expression by  $11.0\% \pm 1.9\%$  when inserted in forward orientation  
158 but had no effect in reverse orientation (Fig. 1c, Extended Data Fig. 3c-d). On average,  
159 individual isolated CBS in forward and reverse orientations reduced Sox2 expression to  
160  $93.0\%(+/-6.5\%)$  and  $97.0\%(+/-6.0\%)$  of parental cells with no insertion, respectively (Fig.  
161 1c).

162

### 163 **Multiple CTCF sites in tandem enable strong transcriptional insulation**

164

165 Since single CBS was weak in transcriptional insulation, we hypothesized that multiple  
166 CBSs collectively may provide more robust insulation, given that TAD boundaries are  
167 enriched for clustered CTCF binding sites<sup>25, 52</sup>. To test this possibility, we constructed a  
168 series of insertion clones harboring multiple CBSs from the *Sox9-Kcnj2* TAD boundary  
169 (Extended Data Fig. 4a). Two or more CBSs were PCR-amplified from mouse genomic  
170 DNA, ligated together and inserted in between the *Sox2* gene and *SE* on the CAST  
171 allele by RMCE as described above. We found that two CBSs, in forward tandem,  
172 reverse tandem, or divergent orientations, all had significantly stronger insulation effect  
173 than individual CBSs alone (Fig. 2a). Notably, combining a weak CBS insulator with one  
174 that had a negligible insulator activity gave rise to stronger insulation than the summed  
175 effects of the two individual sites (Fig. 2a), suggesting that CBSs could have synergistic  
176 insulation effects. Next, we measured the insulator activity of CBS clusters consisting of  
177 up to all four CBSs from the *Sox9-Kcnj2* TAD boundary. ChIP-seq analysis indicated  
178 that CTCF was recruited to the extra copy of the boundary sequence inserted in the  
179 *Sox2* domain (Extended data Fig. 4b). We found that the insulation effect became  
180 stronger as the number of CBS increased, regardless of the orientation of CTCF motifs  
181 (Fig. 2b). Interestingly, the enhancement of insulation conferred by each additional CBS  
182 became smaller when the number of CBSs exceeds two (Extended Data Fig. 4c).



183 Consistent with the requirement for CTCF in transcriptional insulation, removal of the  
184 binding motifs of CTCF within the inserts completely abolished insulation effects of  
185 CBSs (Fig. 2c). Furthermore, introducing CTCF sites downstream of the *Sox2* SE did  
186 not reduce but rather slightly increased *Sox2* expression, likely due to insulation of  
187 interactions between the SE and further downstream chromatin (Fig. 2b). Taken  
188 together, these results suggest that multiple CTCF binding sites arranged in tandem can  
189 function as a potent insulator due to synergistic or additive effects from individual sites.

190

191 Surprisingly, we observed that the insulator containing four CBSs was able to reduce  
192 *Sox2* expression by  $38.47 \pm 3.16\%$ , rather than completely blocking the *Sox2* SE  
193 activity. Interestingly, this insulator substantially increased cell-to-cell variations in *Sox2*  
194 expression, evidenced by the accumulation of cells with extremely low *Sox2*-eGFP  
195 signals (Extended Data Fig. 4d). Moreover, the sub-population of cells expressing ultra-  
196 low *Sox2*-eGFP could revert to the state of higher expression level after extended  
197 culturing, suggesting that the cell-to-cell variation of *Sox2* gene expression was a meta-  
198 stable state (Extended Data Fig. 4e). Furthermore, CTCF insulation did not change the  
199 active chromatin state on either the *Sox2* promoter or its enhancer (Extended data Fig.  
200 4f-g). Collectively, these results suggest that CBS- mediated insulation is permissive  
201 and highly dynamic.

202

### 203 **CTCF-mediated insulator function depends on sequence contexts**

204

205 To better understand the sequence requirements for CTCF-mediated insulation, we  
206 synthesized insulators by concatenating multiple 139-bp genomic DNA sequences,  
207 each containing a 19-bp CTCF motif at the center surrounded by two 60-bp flanking  
208 sequences. Each site was selected from the aforementioned CBSs (four CBSs from the  
209 *Sox9-Kcnj2* TAD boundary, one from the *Pax3-Epha4* TAD boundary and one from the  
210 human  $\beta$ -globin HS5 CBS, Supplementary Table 2). Consistent with observations  
211 described above, the synthetic DNA sequences showed additive effects in  
212 transcriptional insulation (Extended Data Fig. 5a). Additionally, ChIP-seq analysis  
213 confirmed the recruitment of CTCF and the cohesin complex to the synthetic insulators

214 (Fig. 3a). Interestingly, we observed that CBSs with longer flanking sequences (1-kb or  
215 longer) had stronger insulation effects than the shorter 139-bp CBSs, suggesting the  
216 existence of additional elements that could facilitate insulation (Extended Data Fig. 5b).

217  
218 Using the same approach, we also tested whether CBSs from outside of TAD  
219 boundaries could function as insulators. We selected multiple CBSs from non-TAD  
220 boundary regions in the genome, concatenated multiple 139-bp genomic sequences  
221 containing CTCF binding motifs together, and tested their insulation ability in our  
222 insulator reporter assay (Supplementary Table 3). Surprisingly, although these non-TAD  
223 boundary CBSs displayed stronger CTCF binding than those from TAD boundaries at  
224 their original loci, the synthetic DNA sequences made up of six or fifteen tandemly  
225 arrayed 139-bp CBSs from non-boundary regions were unable to function as insulators,  
226 despite presence of strong CTCF ChIP-seq signals (Fig 3b, Extended Data Fig. 5c-d),  
227 indicating that CTCF binding alone is insufficient to bring transcriptional insulation.

228  
229 To further dissect the sequence dependence of CTCF-mediated insulation, we  
230 exchanged the core motifs of 139-bp boundary CBSs with those of the synthetic CBSs  
231 from non-boundary regions. Combining boundary CBS core motifs with non-boundary  
232 adjacent sequences resulted in a much weaker insulation effect than with their original  
233 neighboring sequences of equal lengths (Fig. 3c). In contrast, replacing adjacent  
234 sequences of non-boundary CBSs with those from boundary sites significantly  
235 strengthened their insulation effect (Fig. 3c). However, when the adjacent sequences  
236 were scrambled or kept the same for boundary and non-boundary core motifs, their  
237 effects in insulating Sox2 expression were comparable (Fig. 3c). Together, these results  
238 suggest that transcriptional insulation by CTCF is sequence-context-dependent,  
239 requiring DNA elements flanking the CTCF binding motif.

240

## 241 **Insulators promote formation of local chromatin domains and reduce enhancer-** 242 **promoter contacts**

243

244 Previous data suggest that the *Sox2 SE* forms long-range chromatin contacts with the

245 Sox2 promoter<sup>51, 53</sup>. We hypothesized that insulators may change chromosome topology  
246 to limit enhancer-promoter communication. To test this hypothesis, we performed  
247 PLAC-seq<sup>54</sup> (also known as HiChIP<sup>55</sup>) experiments using mES cell clones with various  
248 insulators inserted at the Sox2 locus to detect promoter-centered chromatin contacts at  
249 high resolution. In control mES cell clones with no insertion, contact frequencies  
250 between the Sox2 promoter and downstream SE were similar between the CAST and  
251 129 alleles (Fig. 4a). Inserting two CBSs from the Sox9-Kcnj2 TAD boundary between  
252 the Sox2 promoter and SE reduced the promoter-enhancer contacts significantly (Fisher  
253 exact test,  $P = 4.91e-4$ ) (Fig.4a). Consistent with the observed dosage-dependent  
254 insulation effects, the Sox2 enhancer-promoter contacts on the CAST allele were further  
255 reduced in cells with the insertion of four CBSs (Fisher exact test,  $P = 5.34e-5$ ) (Fig. 4a).  
256 By contrast, placing two or four CBSs downstream of the Sox2 enhancer did not reduce  
257 the Sox2 enhancer-promoter contacts (Fig. 4a). These results support the model that  
258 insulators act by reducing the enhancer-promoter contacts.

259  
260 To further understand the effect of the inserted insulators on local chromatin structure,  
261 we performed *in situ* Hi-C experiments<sup>56</sup> with mES cell clones containing either two or  
262 four CBSs inserted between the Sox2 gene and its SE on the CAST allele (Fig. 4b-c).  
263 On the 129 allele, Sox2 promoter and downstream SE were found to be in a single TAD  
264 and characterized by strong local chromatin contacts (Fig. 4b). By contrast, the insertion  
265 of two CBSs between the Sox2 gene and SE on the CAST allele created a new TAD  
266 boundary that separated the Sox2 locus into two local chromatin domains, evidenced by  
267 a sharp transition of the Directionality Index (DI) at the insertion site (Fig. 4b).  
268 Introducing four CBSs in the same location created an even stronger TAD boundary, as  
269 the transition of DI was more drastic and contacts across the new local domains were  
270 further reduced (Fig. 4c). Collectively, these results suggest that insulators create a  
271 local domain boundary between promoter and enhancer sites.

272

273 **Direct visualization of insulator-mediated changes of chromatin topology by**  
274 **multiplexed DNA FISH**

275

276 To directly visualize the impacts of insulators on chromatin architecture, we used the  
277 recently developed multiplexed DNA FISH imaging method to trace the chromatin  
278 conformation, which allowed for visualization of the 3D organization of chromatin in  
279 single cells at tens of nanometer resolution<sup>57-59</sup>. We traced the 3D structure of the 210-  
280 kb genomic region (chr3: 34601078-34811078) containing the *Sox2* and *SE* loci across  
281 thousands of individual chromosomes at 5-kb intervals. We partitioned the 210-kb  
282 region into forty-two 5-kb segments and designed a library of primary oligonucleotide  
283 probes, each containing a target sequence for hybridizing to one of the 42 segments  
284 and a readout sequence that is unique to each of the segments (Supplementary Tables  
285 4 and 5). We then sequentially labeled and imaged the 42 segments in each  
286 chromosome, using 14 rounds of hybridization of readout probes with a three-color  
287 imaging scheme (Fig. 5a). The identity of the CAST allele was determined within each  
288 nucleus based on the presence of FISH signal corresponding to the 7.5-kb insulator  
289 sequence inserted into the CAST allele that was absent in the 129 allele (Fig.5a,  
290 Extended Data Fig. 6a).

291  
292 We first carried out chromatin tracing experiments with the mES cell clone containing an  
293 insertion of the 4CBS insulator between the *Sox2* gene and the downstream super-  
294 enhancer on the CAST allele. We obtained chromatin tracing data from 692 cells where  
295 both CAST and 129 alleles were robustly discerned (Extended Data Fig. 6b, **Methods**).  
296 We then measured the spatial distance between each pair of the 5-kb genomic  
297 segments, determined the median distances across all individual chromosomes in these  
298 cells, and constructed a median spatial distance matrix for all segment pairs. Consistent  
299 with results from Hi-C (Fig. 4c), the median spatial distance matrix for the 129 allele  
300 showed a single TAD harboring both the *Sox2* and *SE* loci, whereas the spatial distance  
301 matrix for the CAST allele showed two TADs with a new boundary formed at the  
302 insertion site separating the *Sox2* and *SE* loci (Fig. 5b-c; Extended Data Fig. 7a-c).  
303 Accordingly, individual CAST chromosomes were more likely to form a boundary at the  
304 4CBS insertion (Fig. 5d-e). Moreover, the level of insulation between the two sub-  
305 regions to either side of the inserted 4CBS, containing the *Sox2* promoter and the  
306 super-enhancer was statistically significantly enhanced on the CAST alleles (Fig. 5f).

307 Consistently, the distances between regions across the insulator were increased on the  
308 CAST allele compared to the 129 allele (Extended Data Fig. 8a).

309

310 As controls, we also performed chromatin tracing experiments with two additional mES  
311 cell lines. One of the cell lines contained the same insulator sequence as above but had  
312 all CTCF binding motifs removed. The second control cell line had the same insulator  
313 sequence inserted at an equal distance further downstream of the *Sox2* super-enhancer.  
314 We obtained chromosome tracing data on both CAST and 129 alleles from 790 and 839  
315 cells of the two cell lines, respectively (Extended Data Fig. 6c-d). Based on FACS  
316 analyses, neither control insert reduced *Sox2* expression on the CAST allele (Extended  
317 Data Fig. 7d). Consistently, no local chromatin domain boundary was visible between  
318 the *Sox2* and *SE* loci, and spatial insulation between the *Sox2* gene and the super-  
319 enhancer was indistinguishable between the CAST and 129 alleles (Extended Data Fig.  
320 7e-j). Interestingly, mutant CBS inserted at the same location did not increase the  
321 distance between regions across the insertion (Extended Data Fig. 8b). In contrast, the  
322 4CBS insulator inserted downstream of the *Sox2* super-enhancer appeared to promote  
323 segregation of the *Sox2* domain from downstream chromatin, which may explain the  
324 slightly increased *Sox2* expression in this clone (Extended Data Fig. 8c).

325

326 Surprisingly, although the 4CBS insulator substantially reduced *Sox2* expression and  
327 the contact frequency between *Sox2* and its super-enhancer, the median spatial  
328 distance between *Sox2 SE* and promoter only mildly increased on the CAST alleles  
329 (279nm) compared to the 129 alleles (264nm) (Wilcoxon rank sum test,  $P = 0.082$ ) (Fig.  
330 5g). We hypothesized that only on a small fraction of chromosomes the *Sox2* super-  
331 enhancer was in physical proximity with the *Sox2* promoter to engage in productive  
332 transcription, and insertion of an insulator on the CAST allele could reduce this fraction  
333 of engaged *Sox2* enhancer-promoter configuration selectively on the CAST allele. To  
334 test this hypothesis, we quantified the fraction of CAST alleles that showed a spatial  
335 distance between the *Sox2* promoter and the *SE* shorter than a particular threshold and  
336 compared to that of the 129 alleles in the same cells. Indeed, in the mES cells where  
337 the 4CBS insulator was inserted between the *Sox2* gene and *SE* on the CAST allele,

338 the ratio between the fraction of CAST alleles with spatially proximal enhancer-promoter  
339 pairs and the fraction of 129 alleles with spatially proximal enhancer-promoter pairs was  
340 much smaller than 1, at a spatial distance threshold of 150nm, and the ratio increased  
341 gradually to 1 at a spatial distance threshold of ~300nm (Fig. 5h). By contrast, no  
342 reduction of this ratio was observed at shorter spatial threshold in mES cell clones  
343 where CTCF motifs were deleted from the insulator, or when the insulator sequence  
344 was inserted downstream of the Sox2 super-enhancer(Fig. 5h).

345

346 Taken together, these results support the model that insulators function by establishing  
347 local chromatin domain boundaries and reducing the frequency of productive enhancer-  
348 promoter contacts, thus modulating transcriptional activity.

349

350

351 **Discussion:**

352

353 The sequence-specific DNA binding protein CTCF plays a role in both chromatin  
354 organization and transcriptional insulation, but exactly how chromatin topology is related  
355 to transcriptional insulation remains to be understood. In this study, we developed an  
356 experimental system in the mouse embryonic stem cells to quantify the enhancer-  
357 blocking activity of insulators in the native chromatin context at the *Sox2* locus. We  
358 determined the insulator activity of a number of CTCF binding sites either alone or in  
359 various combinations, and demonstrated that potent insulation was rendered by two or  
360 more CTCF binding sites concatenated together. Importantly, we found that CTCF  
361 binding alone was insufficient to confer insulation activity, rather, sequences  
362 immediately adjacent to CTCF binding motifs were required for potent insulator function.  
363 Consistent with this observation, CTCF binding sites within TAD boundaries are more  
364 likely to function as insulators than those not located at TAD boundaries, regardless of  
365 the strength of their binding by CTCF. Finally, using two orthogonal approaches to  
366 profile chromatin architecture, we showed that CTCF likely mediates transcriptional  
367 insulation by creating local chromatin domain boundaries and reducing the frequency of  
368 productive enhancer-promoter contacts. Our results therefore provide a mechanistic  
369 insight into the link between formation of chromatin domains and CTCF mediated  
370 transcriptional insulation.

371

372 We demonstrated that several factors may be involved in CTCF-mediated  
373 transcriptional insulation in mammalian cells. First, most single CBSs showed stronger  
374 insulation effects in forward than in reverse orientation, although there was one  
375 exception to this trend. Further investigation will be necessary to determine the  
376 molecular basis for the observed biases. Second and more importantly, we found that  
377 potent insulator activity depends on additive or synergistic activities from multiple CBSs.  
378 These results implicate a different working mechanism from the *Drosophila gypsy*  
379 insulator, which was ineffective in blocking enhancer activity when two tandem copies  
380 were combined<sup>60, 61</sup>. However, high multiplicity of CTCF binding sites is not the only

381 requirement for strong insulation. We found that adding nine more non-boundary CBSs  
382 to a synthetic six-CBS cluster that was ineffective in insulation was unable to bring  
383 strong enhancer-blocking activity. Through sequence swapping experiments, we  
384 showed that sequences immediately adjacent to CTCF binding motifs were necessary  
385 for enhancer-blocking function. Our results suggest that CTCF sites in the genome are  
386 not all equivalent to each other, and the dependency of CTCF-mediated insulation on  
387 both dosage and flanking sequence may explain inconsistencies in insulator activities  
388 tested in previous experiments<sup>62</sup>.

389

390 What factors, in addition to CTCF, may contribute to transcriptional insulation by CTCF  
391 binding sites at TAD boundaries? Recent experiments showed that the cohesin complex,  
392 which establishes chromatin loops through a loop-extrusion process, could be  
393 acetylated by ESCO1 at the CTCF binding sites that anchor long-range chromatin  
394 loops<sup>39</sup>. ESCO1-mediated acetylation enhances the chromatin residence time of the  
395 cohesin complex, by antagonizing WAPL-mediated unloading of cohesin from chromatin.  
396 CTCF depletion is shown to reduce the cohesin acetylation and residence time on  
397 chromatin. We speculate that the dosage of CTCF and additional factors binding to  
398 CTCF-adjacent sequences may contribute to the ESCO1-dependent acetylation of  
399 cohesin complex, thereby regulating the ability of cohesin to form long range chromatin  
400 loops and TADs on chromatin.

401

402 Our study also relates the chromatin structure involving enhancer-promoter interactions,  
403 as revealed by various 3C-based and microscopy-based experiments, to enhancer-  
404 dependent transcription. From both the 3C and imaging experiments, we found that the  
405 insertion of multiple CBS sites in tandem, with the appropriate flanking sequences,  
406 induced the formation of a TAD boundary at the insertion site and resulted in physical  
407 segregation of the enhancer and promoter. The chromatin tracing results, providing  
408 direct single-cell measurements of physical distances within the *Sox2* locus, further  
409 allowed us to characterize the structural changes induced by the inserted insulators at a  
410 variety of length scales. Our analysis supports the model that enhancers occasionally  
411 come into close proximity with target promoters to facilitate transcription and that



412 insulator sequences can substantially reduce the frequency of productive enhancer-  
413 promoter interactions that are likely within 300nm distance.

414

415 **Author contributions:**

416 This study was conceived by B.R, H.H. B.R supervised the study. H.H performed  
417 insulator assays and related analysis. R.H and M.Y performed PLAC-seq/HiChIP and  
418 Hi-C experiments. I.J and M.H analyzed PLAC-seq. Y.Z performed Hi-C analysis. Q.Z  
419 and Y.H performed chromatin tracing experiments with help from B.B and X.Z. A.P.J,  
420 B.B, C.K, M.C, S.B, A.C, M.N, analyzed chromatin tracing data. The manuscript was  
421 written by H.H, B.R with input from all co-authors.

422

423 **The authors declare:**

424 Bing Ren is a co-founder and consultant for Arima Genomics, Inc. Xiaowei Zhuang is a  
425 co-founder and consultant for Vizgen, Inc.

426

427 **Acknowledgements:**

428 We are grateful for comments from members of the Ren laboratory. This study was  
429 supported by funding from the Ludwig Institute for Cancer Research and NIH (U54  
430 DK107977, to B.R, M.H, and M.N, and 3U54DK107977-05S1 to B.R.). X.Z is a Howard  
431 Hughes Medical Institute Investigator.

432

433 **Main figure legends:**

434

435 **Fig. 1 | A sensitive insulator reporter assay measures the insulation activity of**  
436 **different CTCF binding sites at the Sox2 locus in mouse ES cells. a,** Left, the  
437 regulatory landscape of the *Sox2* locus in mES cells. Orientations of CTCF sites are  
438 indicated on the top of the signal tracks; Right, genetic constructs of mES cell lines.  
439 Boxed *Sox2* in green represents *Sox2-p2a-egfp in situ* fusion gene, boxed *Sox2* in red  
440 represents *Sox2-p2a-mCherry in situ* fusion gene. The hygromycin phosphotransferase-  
441 thymidine kinase fusion gene *HyTK* is flanked by Flippase recognition sites *FRT* and *F3*.  
442 **b,** Experimental scheme to insert a test sequence into the *Sox2* locus by recombinase  
443 mediated cassette exchange (RMCE). The Flippase expression plasmid and donor  
444 plasmid containing the test sequence were co-electroporated into cells. The donor  
445 plasmid contains *Not1* and *Sbf1* restriction enzyme sites so that the orientation of the  
446 insert can be controlled. Mouse ES cell clones containing the insert were picked,  
447 genotyped, and allelic *Sox2* expression was measured by FACS. **c,** A bar graph shows  
448 the normalized *Sox2*-eGFP expression of the no insertion clone (n=8), different CBS  
449 insertion clones (n=3. For *Sox9\_CBS1* in forward orientation, n=2.) and downstream  
450 insertion controls (n=27). Each dot represents an independently picked colony. One-  
451 way analysis of variance with Bonferroni's multiple comparisons test. ns  $P > 0.05$ , \* $P \leq$   
452 0.05, \*\* $P \leq 0.01$ , \*\*\* $P \leq 0.001$ , \*\*\*\* $P \leq 0.0001$ . Data are mean  $\pm$  sd.

453

454 **Fig. 2 | Multiple CTCF sites in tandem enable strong transcriptional insulation. a,**  
455 A bar graph shows additive or synergistic insulation effects by two CBSs from the *Sox9-*  
456 *Kcnj2* TAD boundary (n=3). Individual CBS sequences were combined by PCR to  
457 create two-CBS insertions. Arrows indicate motif orientation of every CBS. Every  
458 insertion construct was created by an independent RMCE experiment. **b,** A bar graph  
459 shows insulation effects of multiple CBS from the *Sox9-Kcnj2* TAD boundary. Individual  
460 or combined CBS sequences were PCR cloned from mouse genomic DNA. Motif  
461 orientations of CBSs were kept the same as in the *Sox9-Kcnj2* TAD boundary. Each dot  
462 represents an independent clone created by RMCE. 0 CBS, n=8; 1 CBS inside, n=12; 2  
463 CBS inside, n=18; 3 CBS inside, n=13; 4 CBS inside, n=5; 1 CBS downstream, n=15; 2

464 CBS downstream, n=8; 3 CBS downstream, n=4; 4 CBS downstream, n=6. **c**, A bar  
465 graph shows insulation effects of  $\lambda$  DNA (n=3), a combined two-CBS sequence, Sox9  
466 CBS1&2 (n=3), and Sox9 CBS1&2  $\Delta$ core motifs, which is the same 2-CBS sequence  
467 but with the two 19-bp CTCF core motifs deleted (n=3). Inserts were comparable in  
468 length (~4kb). One-way analysis of variance with Bonferroni's multiple comparisons test.  
469 ns  $P > 0.05$ , \* $P \leq 0.05$ , \*\* $P \leq 0.01$ , \*\*\* $P \leq 0.001$ , \*\*\*\* $P \leq 0.0001$ . Data are mean  $\pm$  sd.  
470

471 **Fig. 3 | Synthetic insulators reveal sequence requirements for CTCF-mediated**  
472 **enhancer-blocking. a**, ChIP-seq of CTCF and Rad21. The "Bd syn-6" mES clone  
473 contains the insertion of six 139-bp boundary CBS (four Sox9-Kcnj2 boundary CBSs,  
474 one Pax3-Epha4 boundary CBS and the human  $\beta$ -globin HS5 CBS) between Sox2 and  
475 its super-enhancer. Sequencing reads from no insertion cells were aligned to the mm10  
476 reference genome. Sequencing reads from the insertion clone were aligned to a  
477 customized mm10 genome that included the inserted sequence at the target location.  
478 Motif orientations of nearby CBS and inserted CBS were indicated on the top of signal  
479 tracks. The Sox2 super-enhancer is highlighted in the orange box. **b**, A bar plot shows  
480 insulation effects of synthetic sequences containing tandemly arrayed 139bp-CBS from  
481 boundary and non-boundary regions. Synthetic sequences were inserted between Sox2  
482 and its super-enhancer. For each synthetic sequence, six insertion clones were picked  
483 with three of them in forward orientation and the other three in reverse orientation (n=6).  
484 One-way analysis of variance with Bonferroni's multiple comparisons test. ns  $P > 0.05$ ,  
485 \* $P \leq 0.05$ , \*\* $P \leq 0.01$ , \*\*\* $P \leq 0.001$ , \*\*\*\* $P \leq 0.0001$ . Data are mean  $\pm$  sd. **c**, A bar plot  
486 shows insulation effects of recombined tandemly arrayed 139bp-CBS. CBS core motifs  
487 of boundary and non-boundary sites were combined with either their native adjacent  
488 sequences, scrambled adjacent sequences, or exchanged adjacent sequences with  
489 each other (n=3). Each test sequence contains six tandemly arrayed 139bp-CBS. The  
490 order of the six CBS core motifs was kept the same. One-way analysis of variance with  
491 Bonferroni's multiple comparisons test. ns  $P > 0.05$ , \* $P \leq 0.05$ , \*\* $P \leq 0.01$ , \*\*\* $P \leq 0.001$ ,  
492 \*\*\*\* $P \leq 0.0001$ . Data are mean  $\pm$  sd.

493

494 **Fig. 4 | Enhancer-blocking insulator forms local chromatin domains and reduces**

495 **Sox2 enhancer-promoter chromatin contacts. a**, Allelic chromatin contacts from  
496 PLAC-seq data are shown at the viewpoint of the *Sox2* promoter (n=2, replicates were  
497 merged). PLAC-seq reads were mapped to the mm10 reference genome and split to  
498 CAST and 129 allele based on the haplotypes of parental strains. Ambiguously mapped  
499 reads were discarded. Interaction frequency was normalized by total *cis*-contacts of the  
500 *Sox2* promoter for each allele, bin size = 10kb. Arrows indicate insertion location of  
501 CBSs. Fisher exact tests of *Sox2* enhancer-promoter contacts of the two alleles were  
502 performed. ns  $P > 0.05$ , \*\*\* $P = 4.91e-4$ , \*\*\*\* $P = 5.34e-5$ . Right, insertion construct  
503 matching each clone on the left. The CBS clusters were obtained from the *Sox9-Kcnj2*  
504 TAD boundary by PCR. **b-c**, Allelic Hi-C contact map at *Sox2* locus. Mouse ES cells  
505 with insertion of two CBSs or four CBSs from the *Sox9-Kcnj2* TAD boundary in the  
506 CAST allele were used for the experiments. Hi-C reads were mapped to the mm10  
507 reference genome and split to CAST and 129 allele based on the haplotypes of parental  
508 strains. Ambiguously mapped reads were discarded. Allele-specific contact matrix was  
509 normalized by K-R matrix balancing. Top right, no insertion allele (129); Bottom left,  
510 insertion allele from the same cells (CAST). Bottom, allelic directionality index (DI) score  
511 of Hi-C interaction frequency (n=2, replicates were merged).

512

513 **Fig.5 | Analysis of the effects of an enhancer-blocking insulator on chromatin**  
514 **topology by multiplexed DNA FISH. a**, Scheme of the chromatin tracing experiments  
515 targeting the 210-kb *Sox2* region (chr3: 34601078-34811078). Primary FISH probes  
516 were first hybridized to the entire *Sox2* region. These probes were designed such that  
517 each set of probes targeting a 5-kb segment has unique readout sequences.  
518 Fluorescent readout probes were sequentially added to bind the readout sequences of  
519 each 5-kb segment via intermediate adaptor probes. Three consecutive 5-kb segments  
520 were simultaneously imaged after each round of hybridization using three color  
521 channels. 129 and CAST chromosomes in the same cell were classified based on the  
522 fluorescence signal from the insertion specific probe. The scheme shows an example of  
523 the mouse ES cell line with the insertion of 4CBS from the *Sox9-Kcnj2* TAD boundary  
524 between the *Sox2* gene and its *SE* on the CAST allele. **b-c**, Median spatial-distance  
525 matrix for the 210-kb *Sox2* region of 129 (**b**) and CAST (**c**) chromosomes from 692 cells.

526 The 4CBS cluster was inserted between *Sox2* and its super-enhancer on the CAST  
527 allele. The 26<sup>th</sup> segment was imaged by probes specific for the 4CBS insertion,  
528 therefore, it is absent from the distance matrix of the 129 alleles. **d**, The probability of  
529 each segment to be a single-chromosome domain boundary for the two alleles in **b-c**.  
530 The 26<sup>th</sup> segment on the CAST allele is the 4CBS insertion. **e**, Exemplary single-  
531 chromosome structures of the imaged *Sox2* locus of CAST and 129 alleles. Interpolated  
532 single-chromosome spatial distance matrix and the matched reconstructed 3D structure  
533 are shown for each of the two alleles. Green pixels on the diagonal of the interpolated  
534 matrices indicate segments not detected in the displayed examples of chromatin traces.  
535 **f**, The distribution of single-chromosome insulation scores for each of the alleles  
536 between two domains spanning the *Sox2* promoter – 4CBS insertion (segments 10-25)  
537 and 4CBS insertion – *Sox2* enhancer (segments 26-33) regions, respectively. Insulation  
538 score was calculated for each chromosome as the natural log of the ratio of median  
539 distance between loci across domains and median distance between loci within  
540 domains. **g**, The distribution of *Sox2* enhancer-promoter distance for the CAST and 129  
541 chromosomes in **b-c**. **h**, The ratio of *Sox2* enhancer-promoter contact frequency of  
542 CAST chromosomes to that of 129 chromosomes at different distance cutoffs. Contact  
543 frequency was defined as the fraction of chromosomes with *Sox2* enhancer-promoter  
544 distance below the threshold. The threshold ranges from 150nm to 750nm with 25nm  
545 intervals. The distribution of contact frequency ratio (CAST/129) of the “4CBS” clone is  
546 significantly different from that of the “4CBS mutant” and “4CBS downstream” clone,  
547 with p-value of Kolmogorov–Smirnov test equals to 6.34e-5 and 2.28e-6, respectively.  
548 The error bar represents the 95% confidence interval based upon binomial distribution.

549

550

551

552

553

554

555

556 **Methods:**

557

558 **Cell culture**

559

560 The hybrid F123 mES cell line (F1 *Mus musculus castaneus* × S129/SvJae, maternal  
561 129/Sv, paternal CAST) was from Dr. Rudolf Jaenisch's lab at the Whitehead Institute at  
562 MIT. The wild type F123 mES cell line and engineered clones were maintained in  
563 feeder-free, serum-free 2i conditions (1uM PD03259010, 3uM CHIR99021, 2mM  
564 glutamine, 0.15uM Monothioglycerol, 1000U/ml LIF). The growth medium was changed  
565 every day. Cells were dissociated by Accutase (AT104) and passaged onto 0.2%  
566 gelatin-coated plates every 2-3 days.

567

568 **Genetic engineering of the Sox2 locus**

569

570 Tagging of the *Sox2* gene with fluorescence reporter was performed by CRISPR-Cas9  
571 mediated homologous recombination. Specifically, a guide RNA expression plasmid  
572 (pX330, addgene #42230) targeting the 3' of the *Sox2* gene, together with *egfp* and  
573 *mCherry* donor plasmids were co-electroporated into wild-type F123 cells by Neon  
574 transfection system (MPK1096). Cells were recovered for 2 days, then eGFP<sup>+</sup> mCherry<sup>+</sup>  
575 cells were sorted by FACS and seeded onto a new 0.2% gelatin-coated 60mm dish. 5  
576 days later, a second round of FACS was performed to enrich eGFP<sup>+</sup> mCherry<sup>+</sup> cells.  
577 500-1,000 double positive single cells were seeded onto a new 60mm dish and single  
578 colonies were picked manually another 5 days later. Allele-specific genotyping of *Sox2*  
579 was performed with primers spanning CAST/129 SNPs.

580 mCherry\_Forward: CGTGGAACAGTACGAACGCG

581 egfp\_Forward: GTCCTGCTGGAGTTCGTGAC

582 Reverse (common): AGAACGCTCGGCGCTCTACTT

583 A clone with the CAST allele *Sox2* gene fused with *egfp* and 129 allele *Sox2* gene fused  
584 with *mCherry* was selected as the parental clone. Subsequently, the *HyTK* fusion gene  
585 was integrated into the CAST allele of the parental clone by CRISPR-Cas9 editing.  
586 Specifically, electroporated cells were recovered for 2 days and then cultured in growth  
587 media containing 200ug/ml hygromycin for 7 days. Survived cells were dissociated into  
588 single cells and seeded at the density of 500-1,000 cells per 60mm dish. 5 days later,  
589 colonies were manually picked and genotyped with primers spanning CAST/129 SNPs.  
590 Genotyping primers of *HyTK* fusion gene for insulator reporter and control cell lines:

591 Inside\_F: GGAGCTCACCGATTATGTGC

592 Inside\_R: GAACTTCGGATCCACTGAAAACA

593 Downstream\_F: GGATGGTCCAGACCCACGTC

594 Downstream\_R: AGATGCTCTGTCTCGGTCCTG

595

596 **Donor plasmids cloning for recombinase mediated cassette exchange (RMCE)**

597

598 The donor vector was adapted from the pUC19 plasmid. Two heterotypic Flippase  
599 recognition sites FRT(GAAGTTCCTATTCCGAAGTTCCTATTCTCTAGAAAGTATAGGAACTTC),  
600 F3(GAAGTTCCTATACTATTTGAAGAATAGGAACTTCGGAATAGGAACTTC

601 ), as well as NotI and SbfI restriction enzyme recognition sites, were added into pUC19  
602 plasmid by PCR. The donor vector was then digested with the enzyme cocktail of NotI-  
603 HF (neb, R3642S), SbfI-HF(neb, R3189S), and rSAP(neb, M0371S) for 4hrs at 37 °C.  
604 Individual CTCF binding sites were PCR amplified from mouse or human genomic DNA.  
605 PCR primers contain overhang sequences of NotI and SbfI sites to specify CTCF motif  
606 orientation. PCR products were purified by gel-electrophoresis and digested by NotI-HF  
607 and SbfI-HF at 37°C for 30min. The digestion mix was then inactivated at 65 °C for  
608 20min, purified with SPRI beads (1:1 ratio) and ligated into the digested donor vector.  
609 Ligation products were transformed into Stbl3 chemically competent cells. Positive  
610 clones were screened by PCR and inoculated in 50ml of LB at 37 °C for 16 hours.  
611 Plasmids were extracted using QIAGEN plasmid plus midi kit (cat 12943) and validated  
612 by sanger sequencing.

613

### 614 **Genetic engineering of insulator reporter mESC by RMCE**

615

616 A Flippase expression plasmid(pFlpe) (addgene #13787) and a donor plasmid(pDonor)  
617 were co-electroporated into 0.1 million insulator reporter or control cells at the ratio of  
618 1:4 (pFlpe: pDonor = 1µg :4µg). Cells were seeded onto a 6-well plate and recovered  
619 for two days. Then, cells were cultured in growth media containing 2µM ganciclovir for 5  
620 days. Survived cells were dissociated into single cell suspension and seeded at the  
621 density of 500-1,000 cells per 60mm dish. Five days later, six colonies were picked for  
622 PCR genotyping. Genomic DNA was then extracted by QIAGEN DNeasy Blood &  
623 Tissue Kits (#69506, #69581). For each insert, three independent clones were randomly  
624 picked for FACS analysis and subsequent studies.

625 Genotyping primers for insertion in insulator reporter and control cell lines:

626 Inside\_F: GGAGACAAGAGATGTCAGGAG

627 Inside\_R: TCCGCAAGCAAATAGCTCCATTC

628 Downstream\_F: CATCGGCAATGAGTGTGTGTCA

629 Downstream\_R: GTGATCTCCAGAGTATACGCATGTC

630 Individual CTCF binding sites were combined by PCR to create CBS clusters.

631 Specifically, the 4CBS cluster from the *Sox9-Kcnj2* TAD boundary was consisted of  
632 genomic sequences from chr11:111,523,291-111,524,273, chr11:111,531,104-  
633 111,533,964, and chr11:111,535,307-111,538,959.

634

### 635 **FACS data acquisition and analysis**

636

637 Cells were treated by Accutase(#AT104) at 37°C for 5-7min and resuspended into  
638 single cells with 2ml warm 2i/LIF medium. Cells were then spun down at 1,000rpm for  
639 4min and washed twice with 5ml PBS. Cell pellets were resuspended into single cells  
640 with 1ml PBS and filtered through the 35µm strainer cap of a FACS tube (SKU: FSC-  
641 9005) . Then, cells were sorted by Sony sorter SH800 in analysis mode using a 130µm  
642 chip. For each insertion clone, both GFP and mCherry signals were recorded for 10,000  
643 cells. Multiple technical replicates of the no insertion clone was included as controls for  
644 every FACS sorting experiment. Cells were first gated by SSCA-FSCA for live cells,  
645 then by FSA-FSH for singlets. Fluorescence signals of cells passed gating were  
646 exported in csv files and analyzed in R. Specifically, the GFP signal is normalized by

647 mCherry signal from the same cell. For each insertion clone, the normalized Sox2-  
648 eGFP expression was calculated as:

$$649 \quad \text{Mean}\left(\frac{eGFP}{mCherry}\right)_{\text{Insertion}} / \text{Mean}\left(\frac{eGFP}{mCherry}\right)_{\text{no insertion}}$$

650

651 To better estimate instrument variability in FACS sorting, we used replicates of the no  
652 insertion clone in all experiments as controls when testing the significance of insulation  
653 effects of the inserted DNA elements.

654

### 655 **ChIP-seq:**

656

657 ChIP-seq was performed as previously described with minor modifications<sup>63</sup>. Briefly,  
658 cells were dissociated into single cells and cross-linked by 1% formaldehyde in PBS for  
659 15min at room temperature. Cross-linking was then quenched by 0.125M glycine and  
660 cells were washed twice with 5ml cold PBS. Permeabilized nuclei were prepared with  
661 Covaris truChIP Chromatin Shearing Kit (PN520154) following the manufacturer's  
662 instructions. 1-3 million nuclei were sonicated in 130µl microtube by Covaris M220  
663 instrument (Power, 75W; Duty factor, 10%; Cycle per burst, 200; Time, 10 mins;  
664 Temperature, 7°C.). Sonicated chromatin was diluted with 1xShearing Buffer into a total  
665 volume of 1ml and spun down at 15,000rpm at 4°C to remove cell debris. 5ug  
666 antibodies were added to the supernatant and incubated overnight at 4°C with gentle  
667 rotation (CTCF, ab70303; RAD21, ab992; H3K4me3, Millipore, 04-745; H3K27ac,  
668 Active Motif,39685.). Chromatin was pulled down by protein G Sepharose beads  
669 (#17061801, GE health care) and washed three times with RIPA buffer(10 mM Tris pH  
670 8.0, 1 mM EDTA, 1% Triton X-100, 0.1% SDS, 0.1% Sodium Deoxycholate), two times  
671 with high-salt RIPA buffer (10 mM Tris pH 8.0, 300 mM NaCl, 1 mM EDTA, 1% Triton X-  
672 100, 0.1% SDS, 0.1% Sodium Deoxycholate), once with LiCl buffer (10 mM Tris pH 8.0,  
673 250 mM LiCl, 1 mM EDTA, 0.5% IGEPAL CA-630, 0.1% Sodium Deoxycholate), and  
674 twice with TE buffer (10 mM Tris, pH 8.0; 0.1 mM EDTA). Washed chromatin was  
675 reverse crosslinked overnight with 2µl proteinase K (P8107S, NEB) at 65 °C (1%SDS,  
676 10 mM Tris, pH 8.0, 0.1 mM EDTA). Reverse-crosslinked DNA was column purified and  
677 subjected to end repair, A-tailing, adapter ligation, and PCR amplification. Final libraries  
678 were purified by SPRI beads (0.8:1) and quantified with Qubit HS dsDNA kit (Q32854)  
679 prior to Illumina next-generation sequencing.

680

### 681 **PLAC-seq/HiChIP:**

682

683 Proximity Ligation ChIP-sequencing (PLAC-seq) (also known as HiChIP) libraries were  
684 prepared as previously described<sup>54, 55</sup> with minor modifications. In brief, 2-3 million cells  
685 were crosslinked for 15 minutes at room temperature with 1% methanol-free  
686 formaldehyde and quenched for 5 minutes at room temperature with 0.2 M glycine. The  
687 crosslinked cells were lysed in 300 µl Hi-C lysis buffer (10 mM Tris-HCl, pH 8.0, 10 mM  
688 NaCl, 0.2% IPEGAL CA-630) for 15 minutes on ice and then washed once with 500 µL  
689 lysis buffer (2,500xg for 5 minutes). Subsequently, cells were resuspended in 50 µl 0.5%  
690 SDS and incubated for 10 mins at 62°C then quenched by 160 µl 1.56% Triton X-100  
691 for 15 mins at 37°C. Then, 25 µl of 10X NEBuffer 2 and 100 U Mbol were added to  
692 digest chromatin for 2 hours at 37°C with shaking (1,000 rpm). Enzymes were



693 inactivated by heating for 20 mins at 62°C. Digested fragments were biotin-labeled and  
694 subsequently ligated by T4 DNA ligase buffer (NEB) for 2 hours at 23°C with 300 rpm  
695 gentle rotation. Chromatin was sheared and washed as described in ChIP-seq.  
696 Dynabeads (M-280 Sheep anti-Rabbit IgG) coated with 5µg H3K4me3 antibodies  
697 (Millipore, 04-745) were used for immunoprecipitation. Pulled down chromatin was  
698 treated with 10 µg RNase A for 1 hour at 37°C, and subsequently reverse-crosslinked  
699 by 20 µg proteinase K at 65°C for 2 hours. DNA fragments were purified with Zymo  
700 DNA Clean & Concentrator-5 kit. Ligation junctions were enriched by 25 µl myOne T1  
701 Streptavidin Dynabeads. Libraries were prepared using QIAseq Ultralow Input Library  
702 Kit (Qiagen, #180492). Final libraries were directly PCR amplified from Streptavidin  
703 beads, size selected with SPRI beads (0.5:1 and 1:1), quantified and submitted for  
704 paired-end sequencing.

705

### 706 **Hi-C:**

707

708 Cells were processed in the same way as in PLAC-seq before chromatin shearing steps.  
709 Briefly, nuclei after the ligation step were digested by 50 µl of proteinase K (20mg/ml)  
710 for 30min at 55 °C. DNA was then purified by ethanol precipitation and resuspended in  
711 130µL 10mM Tris-HCl (PH=8.0). Purified DNA was sonicated by Covaris M220  
712 instrument with the following parameters: Duty cycle, 10%; Power, 50; Cycles/burst, 200;  
713 Time, 70 seconds. DNA fragments smaller than 300bp were removed by Ampure XP  
714 bead-based dual size selection (0.55:1 and 0.75:1). Biotin-labeled free DNA ends were  
715 cleaned up by end-repair reaction and ligation junctions were enriched by Streptavidin  
716 Dynabeads as described in PLAC-seq. Ligation junctions were then purified and  
717 subjected to A-tailing, adapter ligation, and PCR amplification. Final libraries were  
718 purified by 0.75x Ampure XP beads, quantified and submitted for pair-end sequencing.

719

### 720 **Multiplexed FISH imaging for chromatin tracing:**

721

722 Glass coverslips were treated by poly-L-lysine for 30min at 37°C. Then, glass coverslips  
723 were washed twice with 5ml PBS and treated by 0.2% gelatin for another 20min at 37°C.  
724 2.5 million mouse ES cells were seeded in a 6cm plastic dish containing the treated  
725 glass coverslip. After 20 hours, cells were cross-linked by 4% paraformaldehyde and  
726 followed by chromatin tracing experiments as described in a previous publication<sup>57</sup>.  
727 Briefly, the entire 210kb Sox2 region was labeled by a library of primary Oligopaint  
728 probes<sup>57, 58</sup>. Each primary probe consists of a unique 42-nucleotide readout sequence  
729 that is specific for each 5kb DNA segment. Next, secondary readout probes  
730 complementary to the readout sequences on the primary probes were added to the cells.  
731 Lastly, fluorophore-labeled common imaging probes complementary to the secondary  
732 probes were added to the cells to allow 3D diffraction-limited imaging of individual DNA  
733 segments. After each round of imaging, the fluorescence signal was extinguished by  
734 using both TCEP [tris(2-carboxyethyl) phosphine] cleavage at a concentration of 50µM  
735 in 2x SSC and high power photobleaching. The process was repeated until all DNA  
736 segments were labeled and imaged. To increase the throughput, we performed three-  
737 color imaging by using three secondary readout imaging probes that were conjugated  
738 with Cy3, Cy5, and Alexa 750, respectively. In this case, three consecutive 5-kb

739 chromatin segments were labeled by each round of imaging. A pool of 42 oligo probe  
740 sets was designed to scan the 210kb Sox2 locus with each set covering a 5 kb DNA  
741 region. The 7.5kb 4 CBS insertion was imaged by the 26th probe set.

742

#### 743 **Data analysis:**

744

#### 745 **ChIP-seq:**

746

747 Sequenced reads were aligned to reference mouse genome mm10 and unmapped  
748 reads and PCR duplicates were removed. For clones with the insertion of synthetic  
749 CTCF binding sites, reads were aligned to a customized mm10 reference genome that  
750 includes the inserted sequence. Signal tracks were generated with the command  
751 “bamCoverage –normlizingRPKM -bs 50 --smoothLength 150“. Allele-specific reads  
752 were resolved based on SNP VCF files described in the PLAC-seq analysis below.

753

#### 754 **PLAC-seq:**

755

756 To resolve allele-specific interactions, we created the VCF files containing SNPs with  
757 respect to the mm10 reference genome for parental strain CAST/EiJ and 129SV/Jae.  
758 Specifically, whole-genome sequencing reads from the two strains were mapped to  
759 mm10, deduplicated, and called SNPs using bcftools. Since parental strains are highly  
760 inbred and should be homozygous for all sites, we removed heterozygous SNP calls  
761 and those with sequencing depth less than 5 and quality less than 30. We further  
762 removed SNPs that were present in both strains. In the end, we kept 19863797  
763 distinguishable SNP sites for the two alleles of the F123 cell line. We used a modified  
764 mapping procedure from WASP<sup>64</sup> pipeline to detect allele-specific contacts. Since WASP  
765 pipeline ignores indels, we further removed all reads which map to within 50 base pairs from the  
766 nearest indel. Briefly, paired-end reads were first mapped to mm10 reference genome,  
767 and reads overlapped with polymorphism sites were remapped after changing the  
768 nucleotide at the SNP’s position to match the other allele. If such, ‘flipped’, reads were  
769 mapped to the same position as before, reads were kept and assigned to either  
770 maternal or paternal allele based on SNP information. Otherwise, the reads were  
771 discarded. For duplicated reads, instead of choosing the read with the highest mapping  
772 score, a random read was kept. We modified the original WAPS mapping procedure by  
773 replacing the bowtie2 alignment tool with bwa-mem and integrated MAPS<sup>65</sup> feather  
774 post-filtering pipeline to resolve the chimeric reads.

775

#### 776 **Hi-C:**

777

778 To process Hi-C data we used our in-house pipeline available at [https://github.com/ren-](https://github.com/ren-lab/hic-pipeline)  
779 [lab/hic-pipeline](https://github.com/ren-lab/hic-pipeline). Briefly, Hi-C reads were aligned to mm10 using BWA-MEM for each  
780 read separately and then paired. For chimeric reads, only 5’ end-mapped locations were  
781 kept. Duplicated read pairs mapped to the same location were removed to leave only  
782 one unique read pair. The output bam files were transformed into juicer file format for  
783 visualization in Juicebox. Contact matrices were normalized using the Knight–Ruiz  
784 matrix balancing method<sup>66</sup>. Directionality Index (DI) score for each sample was  
785 generated at 50-kb resolution and 2-Mb window (40 bins) as described in a previous

786 work<sup>25</sup>. Haplotype phasing was performed using the obtained Cast/129 VCF file. This  
787 created two contact matrices corresponding to 'Cast allele' and '129 allele' for each Hi-C  
788 library. For each phased haplotype of chromosome 3, the DI score was generated at  
789 10-kb resolution and 50-kb window (5 bins).

790

### 791 **Chromatin tracing data processing:**

792

793 Custom software was used to obtain images of chromatin architecture as described  
794 previously<sup>57</sup> with minor modifications. The software identifies centroid positions of each  
795 5-kb chromatin segment using diffraction-limited z-stack images acquired by  
796 epifluorescence microscopy. Chromosome locations were first identified via the  
797 segmentation of the nuclei (stained with DAPI) in each field of view using a  
798 convolutional neural network (CNN). The segmentation masks were then applied to limit  
799 the chromosome candidates to the two most likely clusters of fluorescence spots  
800 presented in each nucleus. We then selected the two spots that showed strongest  
801 averaged fluorescence signal over all imaging rounds as the two alleles for each  
802 nucleus. To avoid selecting the same chromosome, we also required the two spots to  
803 be separated by at least 10 pixels (1.08 $\mu$ m). The algorithm then utilized the identified  
804 chromosome locations to select candidate spots of the imaged 5-kb chromatin  
805 segments in every round of imaging. A Gaussian fitting algorithm was then used to fit  
806 both the signal of each of the candidate segments and the fiducial beads. The chromatic  
807 aberration, flat-field, and drift correction algorithms were adopted from the published  
808 work<sup>57</sup>.

809

810 To minimize misidentification of fluorescence spots, the candidate spot of each segment  
811 was then further evaluated for their likelihood to be accepted or rejected as estimated  
812 by an expectation maximization (EM) algorithm. The EM algorithm computes a score  
813 based upon a product of three terms which measure the relative rank, from 0 to 1, of  
814 each candidate spot of a segment among all candidates within the 3-D window centered  
815 upon the chromosome location. The three terms measure the brightness of the spot, the  
816 proximity of the spot to the estimated chromosome centroid position, and the proximity  
817 of the spot to a moving average localization of the candidates selected in the previous  
818 five rounds of imaging. This scoring scheme enables selection based upon a segment's  
819 similarity to other high-quality segments. It also allows for dimmer candidate spots to be  
820 considered with confidence if the local environment is sufficiently clear of noise. The EM  
821 algorithm selected the highest scoring candidate spot for each chromosome segment in  
822 each round of imaging, while all remaining candidate spots were not considered in  
823 subsequent analyses.

824

825 With the scores computed, we then identified a threshold which resulted in a  
826 chromosome misidentification rate below 10%. The misidentification rate was computed  
827 as the percentage of fluorescence spots among the top discarded candidate spots  
828 which had scores above the EM score threshold that we chose. Finally, only  
829 chromosomes that contained accepted segments with a score above the selected  
830 threshold across at least ~50% of imaging rounds (22/42 rounds) were kept for further

831 analysis. The detection efficiency of each segment for each experiment was computed  
832 as the fraction of segments with accepted candidate spots based upon the above  
833 procedure, which was around 64% for all experiments. To avoid misclassification of the  
834 two alleles in the same mES cells, we only kept cells in which one and only one  
835 chromosome was detected positive for the insertion. Any nuclei showed fluorescence  
836 signal on both alleles or neither allele for the 7.5kb insertion were discarded. In this way,  
837 misclassification of the two alleles is estimated to be less than 5%. Then, pairwise  
838 distances between each 5kb segment were computed for each chromosome. The  
839 resulting matrices were combined into an aggregate distance matrix for each allele by  
840 taking the median value across all chromosomes within each group (CAST or 129). To  
841 compute the single chromosome insulation score, we employed the methods and  
842 algorithms described in previous work<sup>57</sup>. Sox2 enhancer-promoter distance was  
843 calculated by median pairwise Euclidean distances between the genomic locations of  
844 the Sox2 gene (9<sup>th</sup> - 11<sup>th</sup> region) and its enhancer (30<sup>th</sup> - 32<sup>nd</sup> region) for every  
845 chromosome.

846  
847

848 **DATA access:**

849

850 To review GEO accession GSE153403:

851 Go to <https://www.ncbi.nlm.nih.gov/geo/query/acc.cgi?acc=GSE153400>.

852

853

854 **Extended figure legends:**

855

856 **Extended Data Figure. 1 | Genotyping the engineered mES cell lines. a**, Genotyping  
857 *egfp* and *mCherry* labeled *Sox2* gene. Left, Sanger sequencing results for allele-specific  
858 PCR products. Allele-specific SNP is highlighted. Right, Construct of the clone and the  
859 SNP information used to distinguish the two alleles. The reverse primer was common,  
860 while the forward primer was allele-specific, matching with *egfp* and *mCherry* sequence,  
861 respectively. **b-c**, Genotyping the Insulator reporter and control cell lines. Left, Sanger  
862 sequencing and SNP information. Right, Construct of the clone and positions of PCR  
863 primers. The forward primer is specific to the inserted *HyTK* gene. **b**, insulator reporter  
864 cell line. **c**, Insulator control cell line.

865

866 **Extended Data Figure. 2 | Efficiency of insertion by recombinase mediated**  
867 **cassette exchange. a**, Diagram of recombinase mediated cassette exchange (RMCE)  
868 in the insulator reporter cell line. Flippase expression plasmid and the donor plasmid  
869 carrying the insertion sequence were co-electroporated into cells. The replacement only  
870 happens on the CAST allele. **b**, Genotyping insertion clones of  $\lambda$ DNA fragments  
871 generated by RMCE. PCR primers were designed from genomic locations that spanned  
872 the insertion position. Top band, insertion fragment; Bottom band, PCR product from the  
873 no insertion allele.

874

875 **Extended Data Figure. 3 | Normalization of Sox2 expression. a-b**. FACS profiles of  
876 two clones with the insertion of the same  $\lambda$ DNA fragment. **a**, Histograms showing eGFP  
877 and mCherry signals of the two clones; **b**, Density plots of normalized signal  
878 (eGFP/mCherry) of cells from the two clones. For every cell, the ratio of eGFP signal  
879 over mCherry signal was calculated. **c**, A histogram shows the normalized Sox2-eGFP  
880 expression of cells with the human  $\beta$ -globin HS5 insulator inserted between the *Sox2*  
881 gene and its super-enhancer. The CTCF motif of the HS5 insulator was in forward  
882 orientation. **d**, A histogram shows the normalized Sox2-eGFP of cells with the human  $\beta$ -  
883 globin HS5 insulator inserted downstream of the *Sox2* super-enhancer. The CTCF motif  
884 of the HS5 insulator was in forward orientation.

885

886 **Extended Data Figure. 4 | Insulation features of CBSs from the *Sox9-Kcnj2* TAD**  
887 **boundary. a**, Hi-C contact map of the *Sox9-Kcnj2* locus in mouse ES cells. ChIP-seq of  
888 CTCF and RefSeq genes are shown below. CTCF binding sites at the *Sox9-Kcnj2* TAD  
889 boundary are highlighted in the orange box. Zoom in view shows the four CTCF binding  
890 sites cloned for insulator activity test. **b**, ChIP-seq of CTCF in the no insertion clone and  
891 the clone with an extra copy of the four *Sox9-Kcnj2* TAD boundary CBS inserted inside  
892 the *Sox2* domain. ChIP-seq reads were aligned to the mm10 reference genome. **c**,  
893 Reduction in *Sox2*-eGFP expression by one additional CBS (Data are mean  $\pm$  sd). **d**,  
894 FACS profiling of the no insertion clone and the clone with the four *Sox9-Kcnj2* TAD  
895 boundary CBS (4CBS) inserted between *Sox2* and its super-enhancer. GFP<sup>low</sup> and  
896 GFP<sup>high</sup> sub-populations were gated. **e**, FACS profiling of GFP<sup>low</sup>, GFP<sup>high</sup> sub-  
897 populations, and the unsort total population of the 4CBS insertion clone in **d** after  
898 extended culturing for 8 days. Left, GFP signal, right, mCherry signal from the same  
899 cells. **f**, ChIP-seq of H3K4me3 and H3K27ac in the no insertion clone and the clone with  
900 the four *Sox9-Kcnj2* TAD boundary CBS inserted inside the *Sox2* domain (n=2). The  
901 *Sox2* super-enhancer is highlighted in the red box. **g**, Allelic quantification of H3K27ac  
902 signal on the *Sox2* super-enhancer of clones in **f**. H3K27ac ChIP-seq reads on the *Sox2*  
903 super-enhancer were normalized by the total reads mapped to chromosome 3 for each  
904 allele. Then, the ratio of the normalized H3K27ac signal of the two alleles was  
905 calculated (CAST/129).

906

907 **Extended Data Figure. 5 | Insulation effects of synthetic CTCF binding sites a**,  
908 Additive insulation by synthetic CBS from boundary regions. Left top, compositions of  
909 one 139bp-CBS that was synthesized; Left bottom, tandemly arrayed 139bp-CBSs  
910 tested for insulator activity. Right, normalized *Sox2*-eGFP expression of clones with the  
911 tandemly arrayed 139bp-CBSs inserted between the *Sox2* gene and its super-enhancer.  
912 Blue, CBS core motifs were in forward orientation; Red, CBS core motifs were in  
913 reverse orientation. Insertions were on the CAST allele only. n=3, unpaired t-test, two-  
914 tailed. ns  $P > 0.05$ , \* $P \leq 0.05$ , \*\* $P \leq 0.01$ , \*\*\* $P \leq 0.001$ , \*\*\*\* $P \leq 0.0001$ . Data are mean  $\pm$   
915 sd. **b**, Insulation effects of PCR cloned large size CBSs (1-4 kb) and the synthesized

916 139bp-CBSs that contain the same CTCF motifs. (n=12, paired t-test, two-tailed, \*\*\* $P =$   
917 0.0007.). **c**, CTCF binding strength at selected boundary sites and non-boundary sites  
918 in mouse ES cells. ChIP-seq signals of CTCF are shown in 2-kb window. **d**, ChIP-seq of  
919 CTCF and Rad21 in clones with the insertion of six (nBd-syn6) or fifteen (nBd-syn15)  
920 139-bp CBSs obtained from non-boundary regions. ChIP-seq reads were mapped to a  
921 customized mm10 genome that included the inserted sequence at the target site.  
922 Insertion position is highlighted in red box.

923

924 **Extended Data Figure. 6 | Allele classification by multiplexed DNA FISH. a**,  
925 Exemplary images of allele classification. Left, nuclei segmentation and the positions of  
926 CAST and 129 allele in the nucleus. Right, images of the forty-two 5-kb segments  
927 (chr3:34,601,078-34,811,078) of the CAST and 129 allele. The hybridization probes of  
928 the 26<sup>th</sup> segment (highlighted in the red box) specifically targeted the 4CBS sequence.  
929 The chromosome positive for the 26<sup>th</sup> segment (inserted 4CBS) was classified as CAST  
930 allele, the negative chromosome in the same cell was classified as 129 allele. Cells with  
931 both chromosomes positive or both chromosomes negative for the 26<sup>th</sup> segment were  
932 discarded. **b-d**, Bar plots showing detect efficiency of the 42 segments of chromatin  
933 tracing experiments in the “4CBS” clone (**c**), the “4CBS mutant” clone (**d**), and the  
934 “4CBS downstream” clone (**e**). Detect efficiency of each segment was calculated as the  
935 fraction of chromosomes that showed positive fluorescence signal at the specific  
936 imaging round.

937

938 **Extended Data Figure.7 | Spatial organization of the Sox2 locus in engineered**  
939 **mES cells. a**, Bulk Hi-C contact matrix (K-R normalized) of the *Sox2* locus in cells with  
940 4CBS inserted between the *Sox2* gene and its super-enhancer on the CAST allele. **b**,  
941 Median pairwise distance of the same *Sox2* region measured by chromatin tracing  
942 experiment in the same clone in **a**, CAST and 129 chromosomes were combined. **c**,  
943 Correlation between the Hi-C contact frequency matrix (**a**) and median distance  
944 matrix(**b**). **d**, Normalized Sox2-eGFP expression in the no insertion clone(n=8), the  
945 “4CBS” clone (same cells in **a-b**, n=2), and two insertion controls. “4CBS mutant” (n=3)  
946 was the insertion clone of a 4CBS sequence that had all four 19-bp CTCF core motifs

947 deleted (4CBS $\Delta$ ). The insertion position was the same as the “4CBS” clone; “4CBS  
948 downstream” (n=3) was the insertion clone of the same 4CBS insulator sequence but  
949 located at equal distance downstream of the Sox2 enhancer. One-way analysis of  
950 variance with Bonferroni’s multiple comparisons test. ns  $P > 0.05$ , \* $P \leq 0.05$ , \*\* $P \leq 0.01$ ,  
951 \*\*\* $P \leq 0.001$ , \*\*\*\* $P \leq 0.0001$ . Data are mean  $\pm$  sd. **e-f**, Median spatial-distance matrix for  
952 the 210kb Sox2 region (chr3: 34601078-34811078) of 129 (left) and CAST (right)  
953 chromosomes of the “4CBS mutant” clone(**e**) and the “4CBS downstream clone”(f). The  
954 26<sup>th</sup> segment was imaged by 4CBS specific probes; therefore, it is absent on the  
955 distance matrix of no insertion 129 alleles. Similarly, the 38<sup>th</sup> segment is absent on the  
956 distance matrix of 129 alleles in **f**. **g-h**, The probability of forming single-chromosome  
957 domain boundaries at each segment for the two alleles of the “4CBS mutant” clone (**g**),  
958 and the “4CBS downstream” clone (**h**). **i**, The distribution of single-chromosome  
959 insulation scores for each of the alleles between two domains spanning the Sox2  
960 promoter – 4CBS $\Delta$  insertion (segments 10-25) and 4CBS $\Delta$  insertion – Sox2 enhancer  
961 (segments 26-33) regions, respectively. Insulation score was calculated for each  
962 chromosome as the natural log of the ratio of median distance between loci across  
963 domains and median distance between loci within domains. **j**, The distribution of single-  
964 chromosome insulation scores for each of the alleles between the same two domains  
965 (segment 10-25 and segment 26-33) in (**i**) for the “4CBS downstream” clone. Insulation  
966 score was calculated in the same way as in (**i**).

967

968 **Extended Data Figure.8 | Radius of gyration of sub-domains.** **a**, Difference of the  
969 median distance matrices between the CAST and 129 allele of the “4CBS” clone. **b**,  
970 Difference of the median distance matrices between the CAST and 129 allele of the  
971 “4CBS mutant” clone. **c**, Difference of the median distance matrices between the CAST  
972 and 129 allele of the “4CBS downstream” clone.

973



974 **Reference:**

- 975 1. Hnisz, D., Day, D.S. & Young, R.A. Insulated Neighborhoods: Structural and Functional Units of Mammalian  
976 Gene Control. *Cell* **167**, 1188-1200 (2016).
- 977 2. Kellis, M. *et al.* Defining functional DNA elements in the human genome. *Proc Natl Acad Sci U S A* **111**,  
978 6131-6138 (2014).
- 979 3. Levine, M., Cattoglio, C. & Tjian, R. Looping back to leap forward: transcription enters a new era. *Cell* **157**,  
980 13-25 (2014).
- 981 4. West, A.G., Gaszner, M. & Felsenfeld, G. Insulators: many functions, many mechanisms. *Genes Dev* **16**,  
982 271-288 (2002).
- 983 5. Sun, F.L. & Elgin, S.C. Putting boundaries on silence. *Cell* **99**, 459-462 (1999).
- 984 6. Geyer, P.K. & Corces, V.G. DNA position-specific repression of transcription by a Drosophila zinc finger  
985 protein. *Genes Dev* **6**, 1865-1873 (1992).
- 986 7. Recillas-Targa, F., Bell, A.C. & Felsenfeld, G. Positional enhancer-blocking activity of the chicken beta-  
987 globin insulator in transiently transfected cells. *Proc Natl Acad Sci U S A* **96**, 14354-14359 (1999).
- 988 8. Stief, A., Winter, D.M., Stratling, W.H. & Sippel, A.E. A nuclear DNA attachment element mediates  
989 elevated and position-independent gene activity. *Nature* **341**, 343-345 (1989).
- 990 9. Gurudatta, B.V. & Corces, V.G. Chromatin insulators: lessons from the fly. *Brief Funct Genomic Proteomic*  
991 **8**, 276-282 (2009).
- 992 10. Chung, J.H., Bell, A.C. & Felsenfeld, G. Characterization of the chicken beta-globin insulator. *Proc Natl*  
993 *Acad Sci U S A* **94**, 575-580 (1997).
- 994 11. Lobanekov, V.V. *et al.* A novel sequence-specific DNA binding protein which interacts with three  
995 regularly spaced direct repeats of the CCCTC-motif in the 5'-flanking sequence of the chicken c-myc gene.  
996 *Oncogene* **5**, 1743-1753 (1990).
- 997 12. Bell, A.C. & Felsenfeld, G. Methylation of a CTCF-dependent boundary controls imprinted expression of  
998 the Igf2 gene. *Nature* **405**, 482-485 (2000).
- 999 13. Flavahan, W.A. *et al.* Insulator dysfunction and oncogene activation in IDH mutant gliomas. *Nature* **529**,  
1000 110-114 (2016).
- 1001 14. Katainen, R. *et al.* CTCF/cohesin-binding sites are frequently mutated in cancer. *Nat Genet* **47**, 818-821  
1002 (2015).
- 1003 15. Ohlsson, R., Renkawitz, R. & Lobanekov, V. CTCF is a uniquely versatile transcription regulator linked to  
1004 epigenetics and disease. *Trends Genet* **17**, 520-527 (2001).
- 1005 16. Filippova, G.N. *et al.* An exceptionally conserved transcriptional repressor, CTCF, employs different  
1006 combinations of zinc fingers to bind diverged promoter sequences of avian and mammalian c-myc  
1007 oncogenes. *Mol Cell Biol* **16**, 2802-2813 (1996).
- 1008 17. Lupianez, D.G. *et al.* Disruptions of topological chromatin domains cause pathogenic rewiring of gene-  
1009 enhancer interactions. *Cell* **161**, 1012-1025 (2015).
- 1010 18. Shukla, S. *et al.* CTCF-promoted RNA polymerase II pausing links DNA methylation to splicing. *Nature* **479**,  
1011 74-79 (2011).
- 1012 19. Vostrov, A.A. & Quitschke, W.W. The zinc finger protein CTCF binds to the APBbeta domain of the amyloid  
1013 beta-protein precursor promoter. Evidence for a role in transcriptional activation. *J Biol Chem* **272**, 33353-  
1014 33359 (1997).
- 1015 20. Zhang, X. *et al.* Fundamental roles of chromatin loop extrusion in antibody class switching. *Nature* **575**,  
1016 385-389 (2019).
- 1017 21. Guo, Y. *et al.* CTCF/cohesin-mediated DNA looping is required for protocadherin alpha promoter choice.  
1018 *Proc Natl Acad Sci U S A* **109**, 21081-21086 (2012).
- 1019 22. Guo, Y. *et al.* CRISPR Inversion of CTCF Sites Alters Genome Topology and Enhancer/Promoter Function.  
1020 *Cell* **162**, 900-910 (2015).
- 1021 23. Ghirlando, R. & Felsenfeld, G. CTCF: making the right connections. *Genes Dev* **30**, 881-891 (2016).
- 1022 24. Phillips-Cremins, J.E. & Corces, V.G. Chromatin insulators: linking genome organization to cellular function.  
1023 *Mol Cell* **50**, 461-474 (2013).
- 1024 25. Dixon, J.R. *et al.* Topological domains in mammalian genomes identified by analysis of chromatin  
1025 interactions. *Nature* **485**, 376-380 (2012).

- 1026 26. Nora, E.P. *et al.* Spatial partitioning of the regulatory landscape of the X-inactivation centre. *Nature* **485**,  
1027 381-385 (2012).
- 1028 27. Franke, M. *et al.* Formation of new chromatin domains determines pathogenicity of genomic duplications.  
1029 *Nature* **538**, 265-269 (2016).
- 1030 28. Nora, E.P. *et al.* Targeted Degradation of CTCF Decouples Local Insulation of Chromosome Domains from  
1031 Genomic Compartmentalization. *Cell* **169**, 930-944 e922 (2017).
- 1032 29. Luppino, J.M. *et al.* Cohesin promotes stochastic domain intermingling to ensure proper regulation of  
1033 boundary-proximal genes. *Nat Genet* (2020).
- 1034 30. Wutz, G. *et al.* Topologically associating domains and chromatin loops depend on cohesin and are  
1035 regulated by CTCF, WAPL, and PDS5 proteins. *EMBO J* **36**, 3573-3599 (2017).
- 1036 31. Alipour, E. & Marko, J.F. Self-organization of domain structures by DNA-loop-extruding enzymes. *Nucleic  
1037 Acids Res* **40**, 11202-11212 (2012).
- 1038 32. Davidson, I.F. *et al.* DNA loop extrusion by human cohesin. *Science* **366**, 1338-1345 (2019).
- 1039 33. Fudenberg, G. *et al.* Formation of Chromosomal Domains by Loop Extrusion. *Cell Rep* **15**, 2038-2049  
1040 (2016).
- 1041 34. Haarhuis, J.H.I. *et al.* The Cohesin Release Factor WAPL Restricts Chromatin Loop Extension. *Cell* **169**, 693-  
1042 707 e614 (2017).
- 1043 35. Kim, Y., Shi, Z., Zhang, H., Finkelstein, I.J. & Yu, H. Human cohesin compacts DNA by loop extrusion.  
1044 *Science* **366**, 1345-1349 (2019).
- 1045 36. Rao, S.S.P. *et al.* Cohesin Loss Eliminates All Loop Domains. *Cell* **171**, 305-320 e324 (2017).
- 1046 37. Sanborn, A.L. *et al.* Chromatin extrusion explains key features of loop and domain formation in wild-type  
1047 and engineered genomes. *Proc Natl Acad Sci U S A* **112**, E6456-6465 (2015).
- 1048 38. Vian, L. *et al.* The Energetics and Physiological Impact of Cohesin Extrusion. *Cell* **173**, 1165-1178 e1120  
1049 (2018).
- 1050 39. Wutz, G. *et al.* ESCO1 and CTCF enable formation of long chromatin loops by protecting cohesin(STAG1)  
1051 from WAPL. *Elife* **9** (2020).
- 1052 40. Brackley, C.A. *et al.* Nonequilibrium Chromosome Looping via Molecular Slip Links. *Phys Rev Lett* **119**,  
1053 138101 (2017).
- 1054 41. Barbieri, M. *et al.* Complexity of chromatin folding is captured by the strings and binders switch model.  
1055 *Proc Natl Acad Sci U S A* **109**, 16173-16178 (2012).
- 1056 42. Bianco, S. *et al.* Polymer physics predicts the effects of structural variants on chromatin architecture. *Nat  
1057 Genet* **50**, 662-667 (2018).
- 1058 43. Brackley, C.A., Taylor, S., Papantonis, A., Cook, P.R. & Marenduzzo, D. Nonspecific bridging-induced  
1059 attraction drives clustering of DNA-binding proteins and genome organization. *Proc Natl Acad Sci U S A*  
1060 **110**, E3605-3611 (2013).
- 1061 44. Buckle, A., Brackley, C.A., Boyle, S., Marenduzzo, D. & Gilbert, N. Polymer Simulations of Heteromorphic  
1062 Chromatin Predict the 3D Folding of Complex Genomic Loci. *Mol Cell* **72**, 786-797 e711 (2018).
- 1063 45. Di Pierro, M., Zhang, B., Aiden, E.L., Wolynes, P.G. & Onuchic, J.N. Transferable model for chromosome  
1064 architecture. *Proc Natl Acad Sci U S A* **113**, 12168-12173 (2016).
- 1065 46. Conte, M. *et al.* Polymer physics indicates chromatin folding variability across single-cells results from  
1066 state degeneracy in phase-separation. *Nature Com.* in press (2020); *bioRxiv*, 2020.2005.2016.099275  
1067 (2020).
- 1068 47. Schwarzer, W. *et al.* Two independent modes of chromatin organization revealed by cohesin removal.  
1069 *Nature* **551**, 51-56 (2017).
- 1070 48. Despag, A. *et al.* Functional dissection of the Sox9-Kcnj2 locus identifies nonessential and instructive  
1071 roles of TAD architecture. *Nat Genet* **51**, 1263-1271 (2019).
- 1072 49. Gribnau, J., Hochedlinger, K., Hata, K., Li, E. & Jaenisch, R. Asynchronous replication timing of imprinted  
1073 loci is independent of DNA methylation, but consistent with differential subnuclear localization. *Genes  
1074 Dev* **17**, 759-773 (2003).
- 1075 50. Li, Y. *et al.* CRISPR reveals a distal super-enhancer required for Sox2 expression in mouse embryonic stem  
1076 cells. *PLoS One* **9**, e114485 (2014).
- 1077 51. Zhou, H.Y. *et al.* A Sox2 distal enhancer cluster regulates embryonic stem cell differentiation potential.  
1078 *Genes Dev* **28**, 2699-2711 (2014).

- 1079 52. Kentepozidou, E. *et al.* Clustered CTCF binding is an evolutionary mechanism to maintain topologically  
1080 associating domains. *Genome Biol* **21**, 5 (2020).
- 1081 53. Yan, J. *et al.* Histone H3 lysine 4 monomethylation modulates long-range chromatin interactions at  
1082 enhancers. *Cell Res* **28**, 387 (2018).
- 1083 54. Fang, R. *et al.* Mapping of long-range chromatin interactions by proximity ligation-assisted ChIP-seq. *Cell*  
1084 *Res* **26**, 1345-1348 (2016).
- 1085 55. Mumbach, M.R. *et al.* HiChIP: efficient and sensitive analysis of protein-directed genome architecture. *Nat*  
1086 *Methods* **13**, 919-922 (2016).
- 1087 56. Rao, S.S. *et al.* A 3D map of the human genome at kilobase resolution reveals principles of chromatin  
1088 looping. *Cell* **159**, 1665-1680 (2014).
- 1089 57. Bintu, B. *et al.* Super-resolution chromatin tracing reveals domains and cooperative interactions in single  
1090 cells. *Science* **362** (2018).
- 1091 58. Mateo, L.J. *et al.* Visualizing DNA folding and RNA in embryos at single-cell resolution. *Nature* **568**, 49-54  
1092 (2019).
- 1093 59. Wang, S. *et al.* Spatial organization of chromatin domains and compartments in single chromosomes.  
1094 *Science* **353**, 598-602 (2016).
- 1095 60. Cai, H.N. & Shen, P. Effects of cis arrangement of chromatin insulators on enhancer-blocking activity.  
1096 *Science* **291**, 493-495 (2001).
- 1097 61. Muravyova, E. *et al.* Loss of insulator activity by paired Su(Hw) chromatin insulators. *Science* **291**, 495-498  
1098 (2001).
- 1099 62. Liu, M. *et al.* Genomic discovery of potent chromatin insulators for human gene therapy. *Nat Biotechnol*  
1100 **33**, 198-203 (2015).
- 1101 63. Local, A. *et al.* Identification of H3K4me1-associated proteins at mammalian enhancers. *Nat Genet* **50**, 73-  
1102 82 (2018).
- 1103 64. van de Geijn, B., McVicker, G., Gilad, Y. & Pritchard, J.K. WASP: allele-specific software for robust  
1104 molecular quantitative trait locus discovery. *Nat Methods* **12**, 1061-1063 (2015).
- 1105 65. Juric, I. *et al.* MAPS: Model-based analysis of long-range chromatin interactions from PLAC-seq and HiChIP  
1106 experiments. *PLoS Comput Biol* **15**, e1006982 (2019).
- 1107 66. Durand, N.C. *et al.* Juicebox Provides a Visualization System for Hi-C Contact Maps with Unlimited Zoom.  
1108 *Cell Syst* **3**, 99-101 (2016).
- 1109

**Fig.1:**

bioRxiv preprint doi: <https://doi.org/10.1101/2020.07.07.192526>; this version posted July 8, 2020. The copyright holder for this preprint (which was not certified by peer review) is the author/funder. All rights reserved. No reuse allowed without permission.

chr3:34,620,823-34,805,690

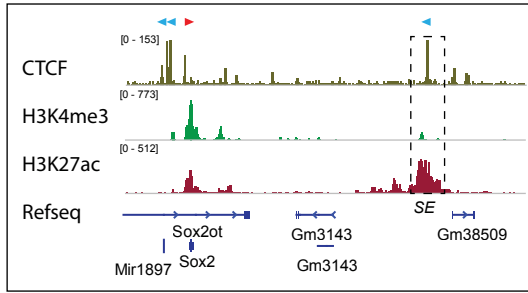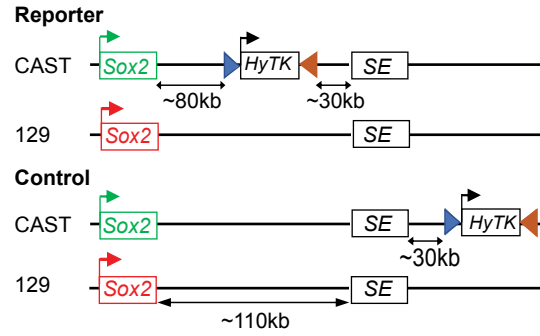

**b**

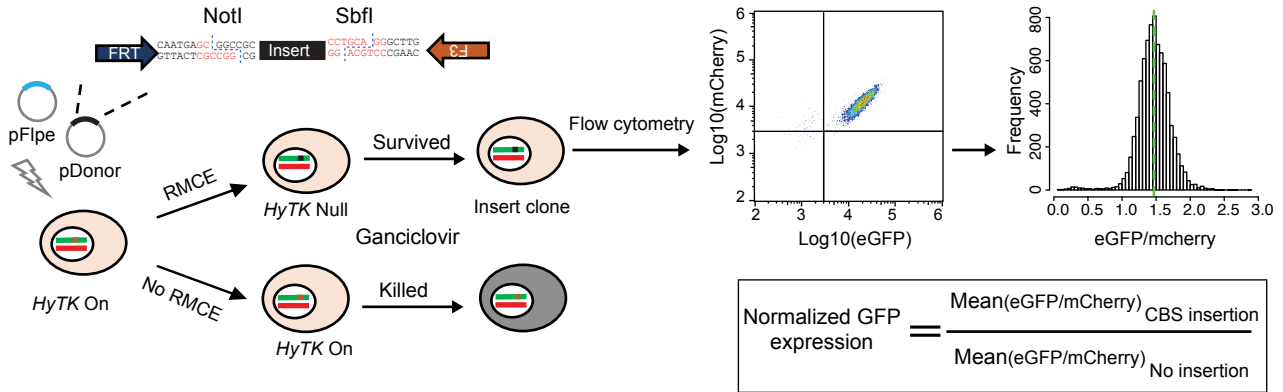

**c**

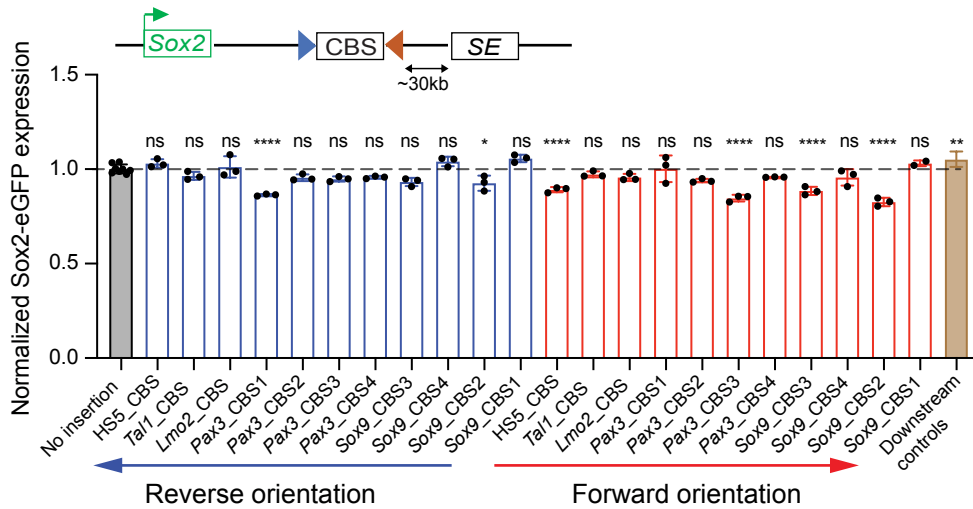

**Fig.2:**

bioRxiv preprint doi: <https://doi.org/10.1101/2020.07.07.192526>; this version posted July 8, 2020. The copyright holder for this preprint (which was not certified by peer review) is the author/funder. All rights reserved. No reuse allowed without permission.

**a**

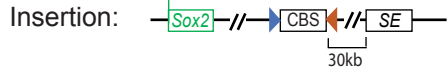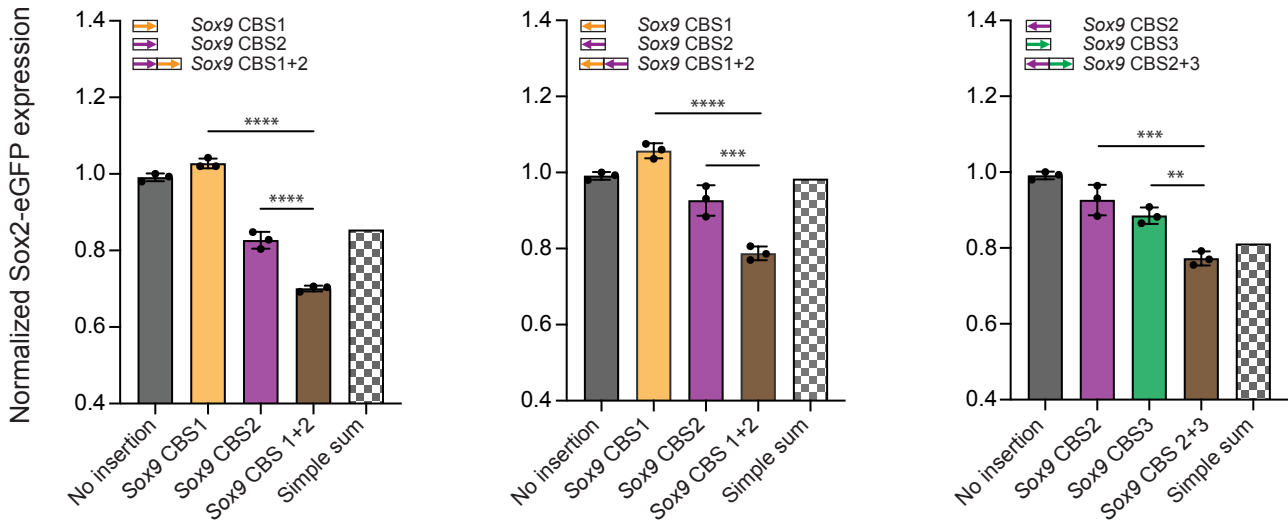

**b**

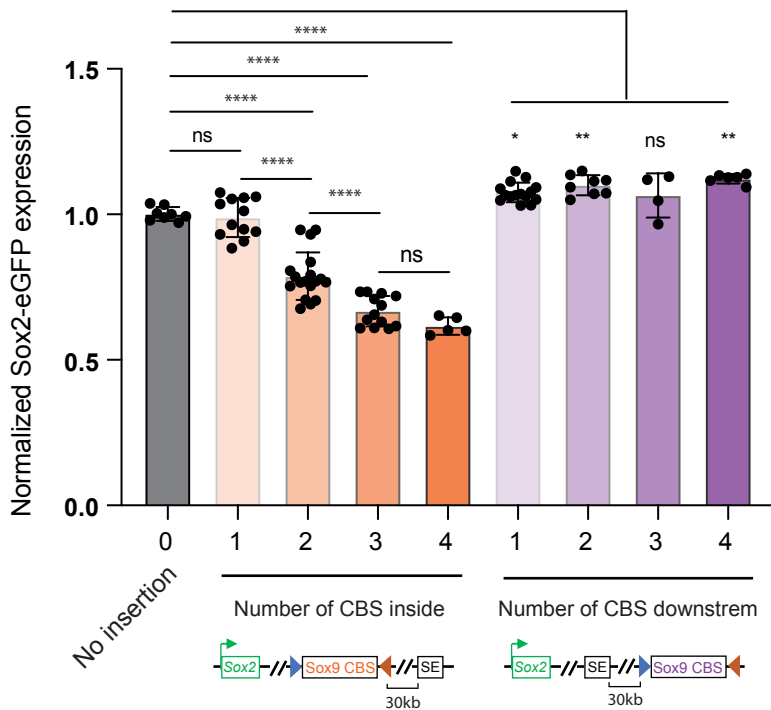

**c**

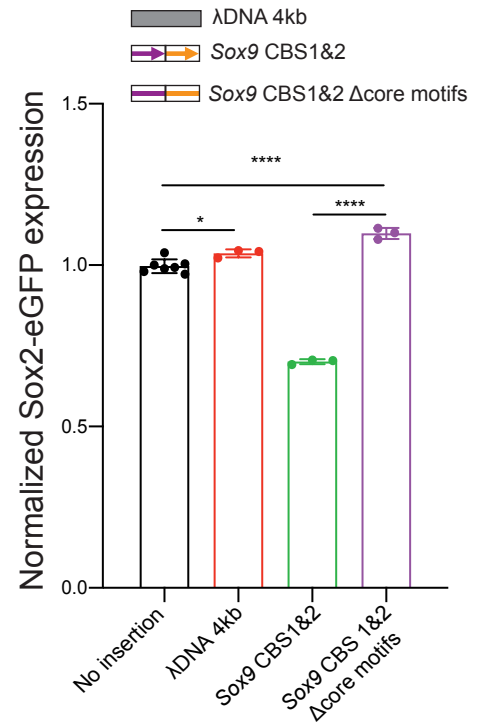

**Fig.3:**

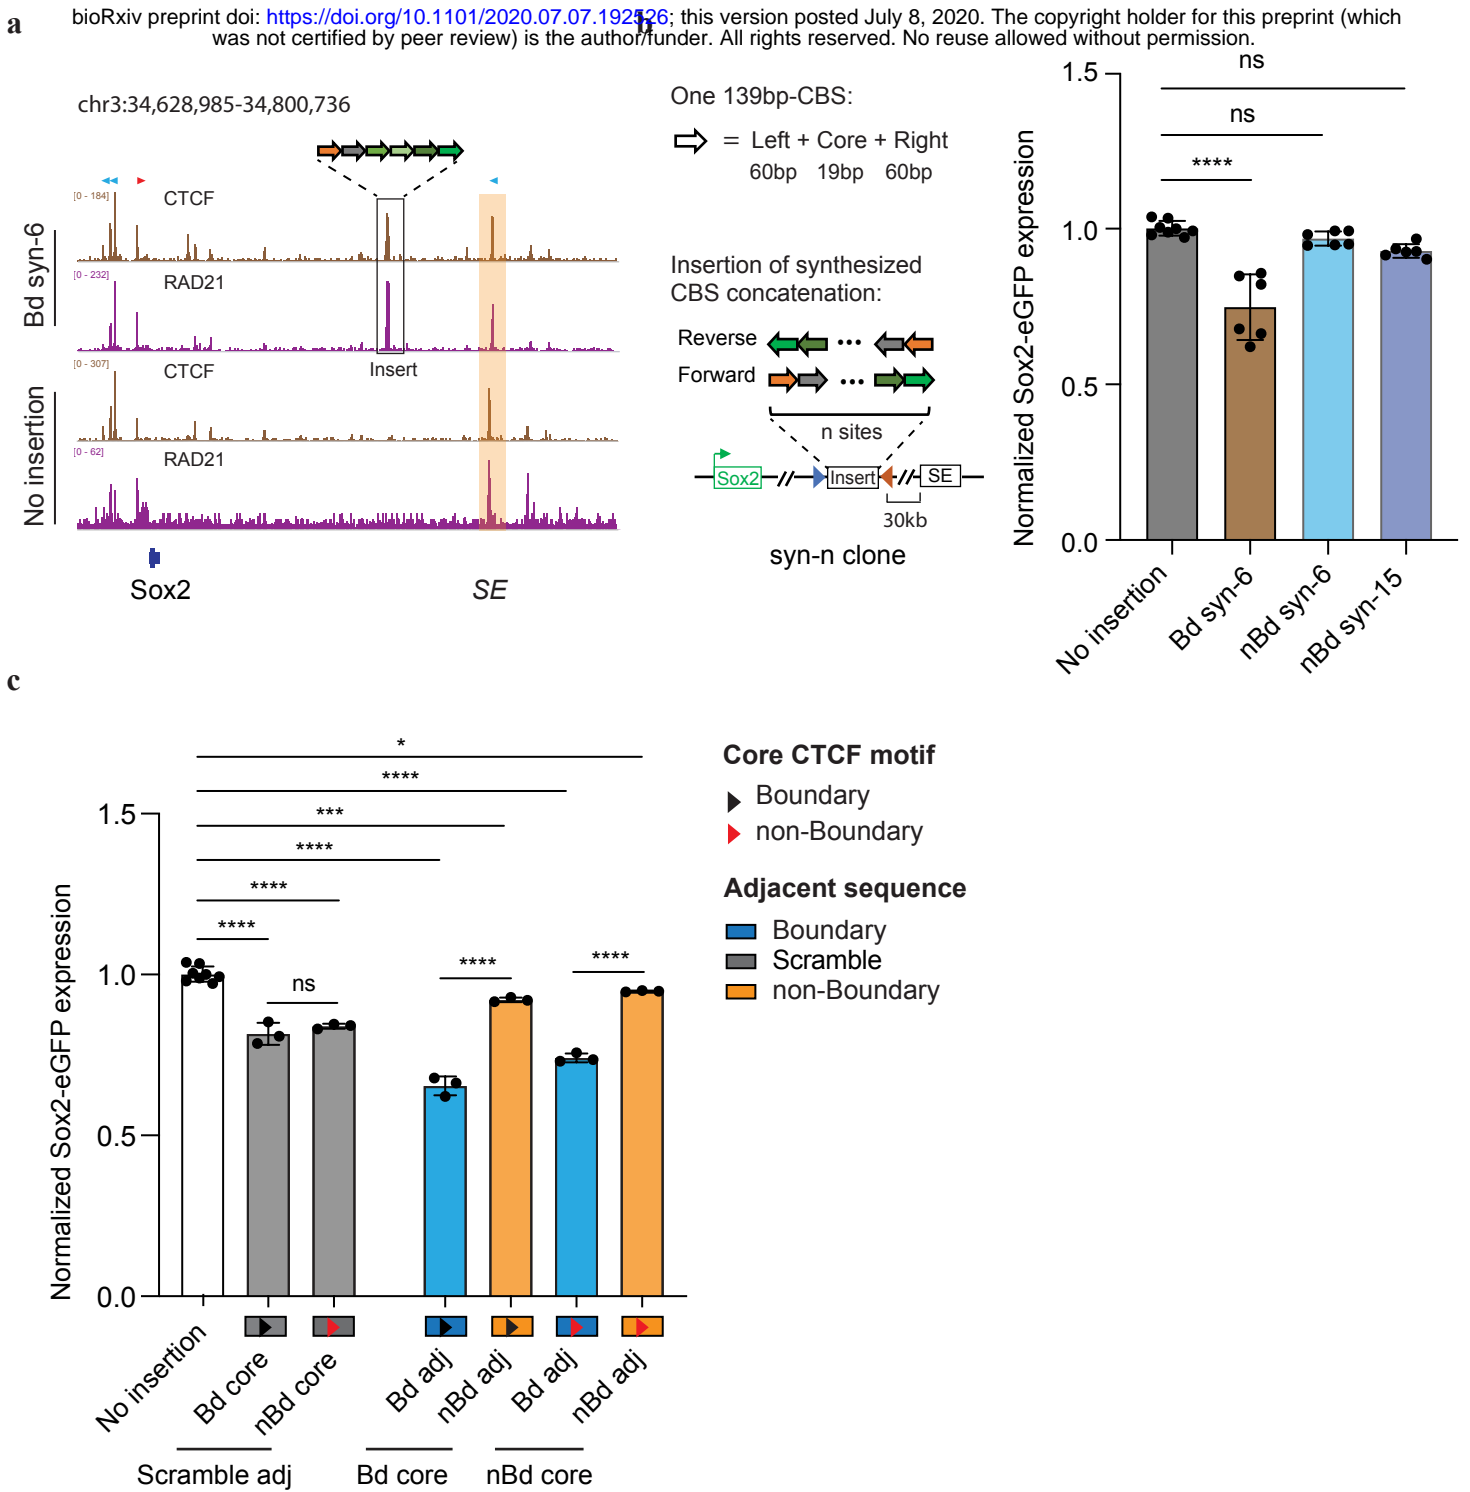

**Fig.4:**

**a**  
 bioRxiv preprint doi: <https://doi.org/10.1101/2020.07.07.192526>; this version posted July 8, 2020. The copyright holder for this preprint (which was not certified by peer review) is the author/funder. All rights reserved. No reuse allowed without permission.

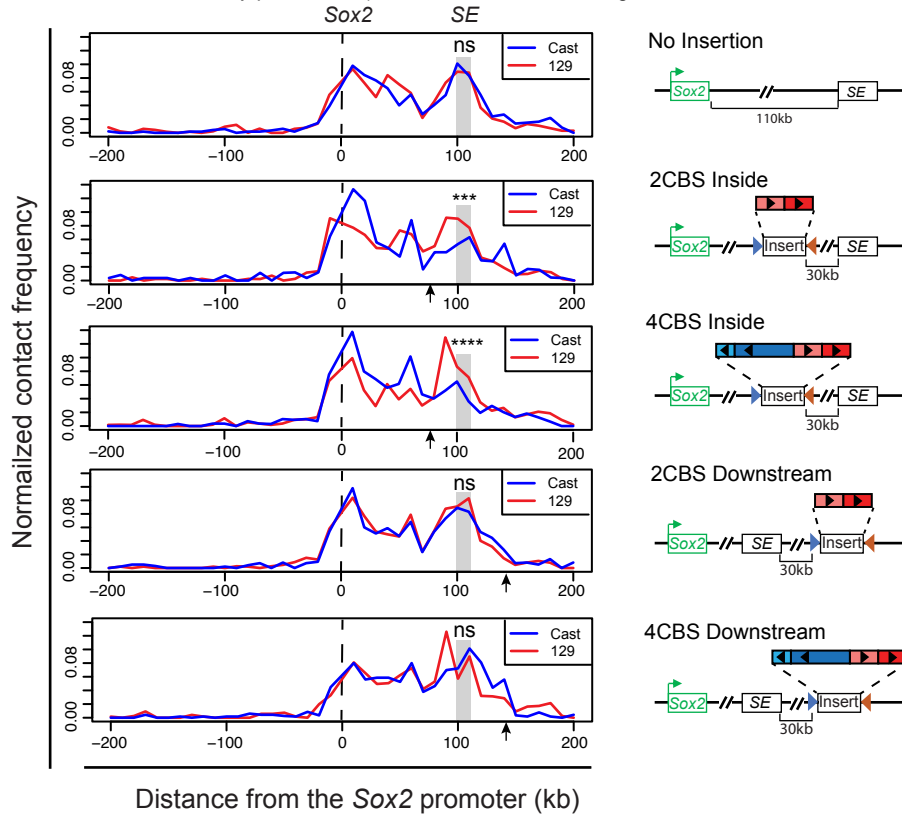

**b**

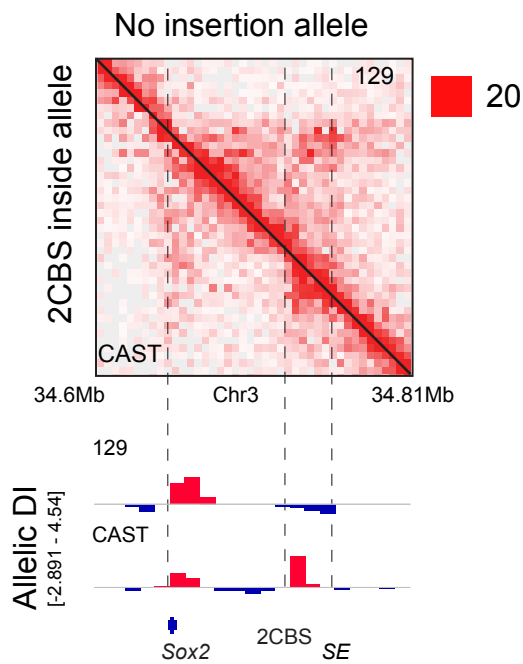

**c**

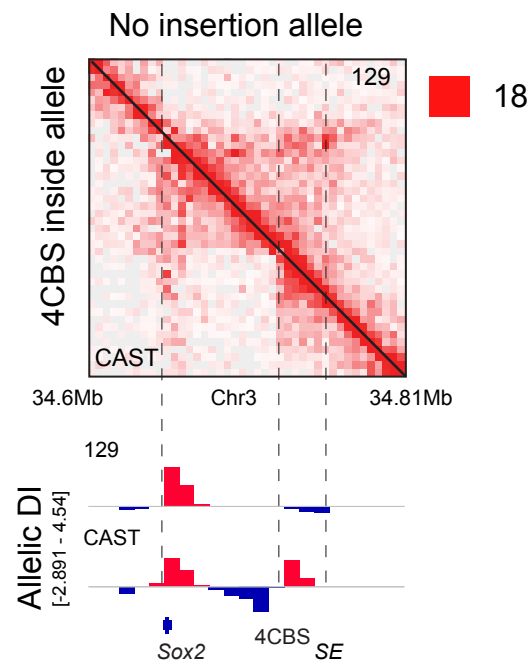

**Fig.5:**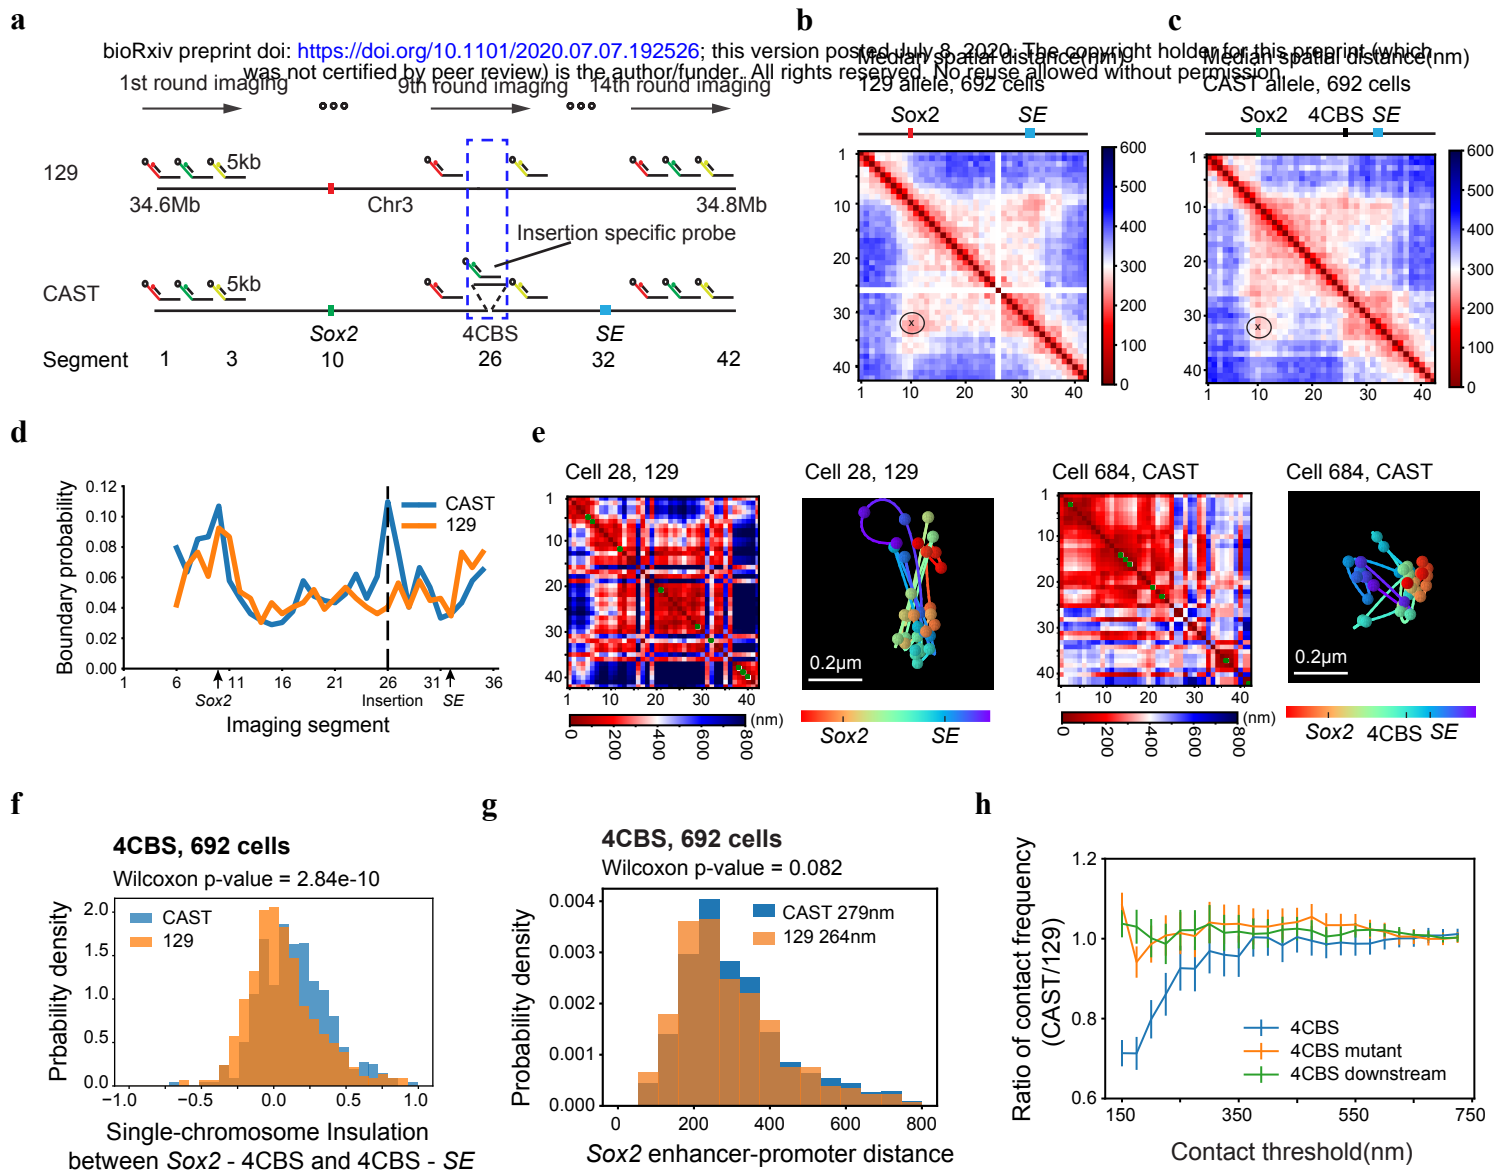



## Extended Data Fig1.

**a** bioRxiv preprint doi: <https://doi.org/10.1101/2020.07.07.192526>; this version posted July 8, 2020. The copyright holder for this preprint (which was not certified by peer review) is the author/funder. All rights reserved. No reuse allowed without permission.

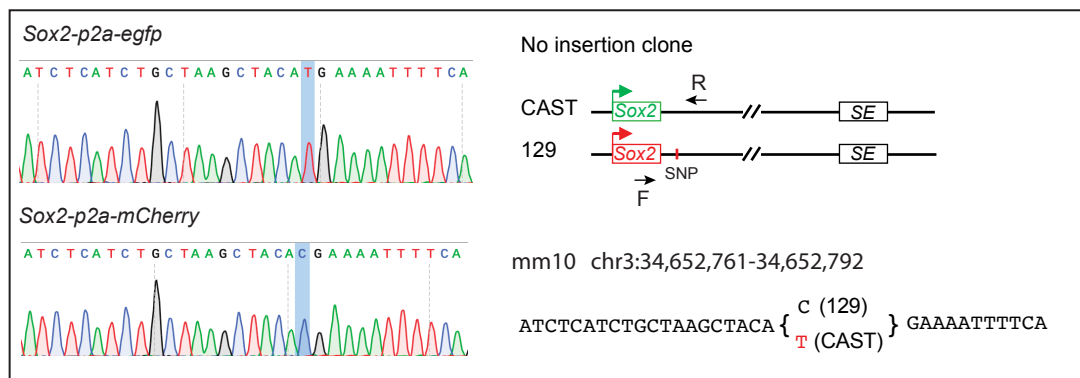

**b**

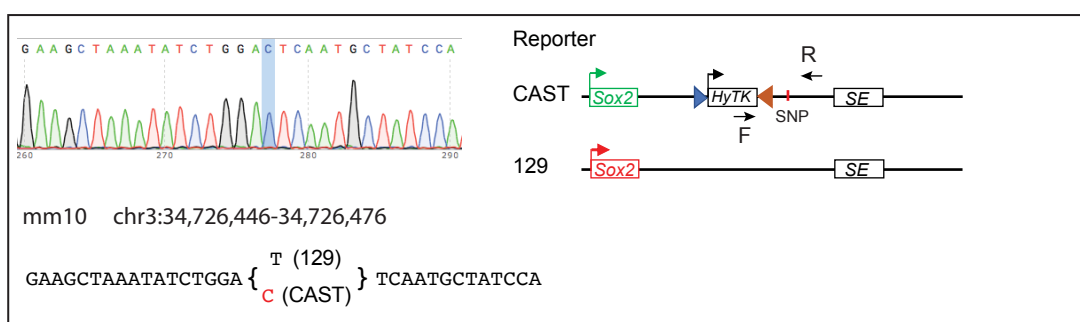

**c**

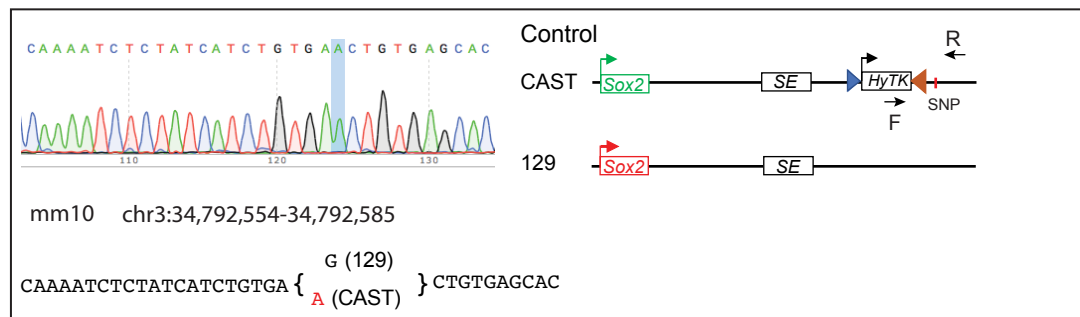

## Extended Data Fig2.

**a** bioRxiv preprint doi: <https://doi.org/10.1101/2020.07.07.192526>; this version posted July 8, 2020. The copyright holder for this preprint (which was not certified by peer review) is the author/funder. All rights reserved. No reuse allowed without permission.

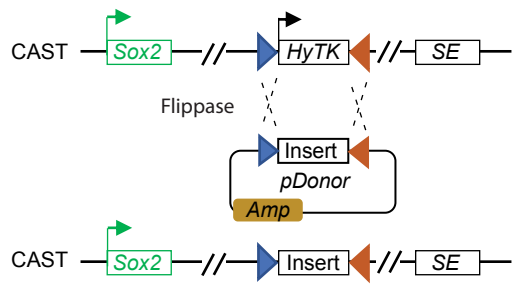

Diagram of recombinase mediated cassette exchange (RMCE)

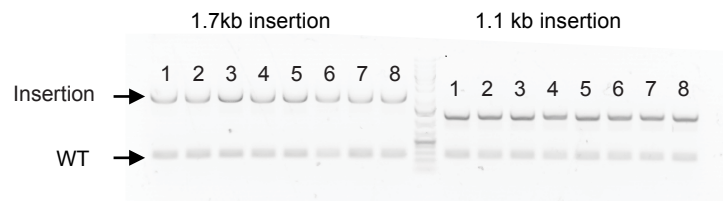

Genotyping RMCE insertion clones

## Extended Data Fig3.

bioRxiv preprint doi: <https://doi.org/10.1101/2020.07.07.192526>; this version posted July 8, 2020. The copyright holder for this preprint (which was not certified by peer review) is the author/funder. All rights reserved. No reuse allowed without permission.

**a**

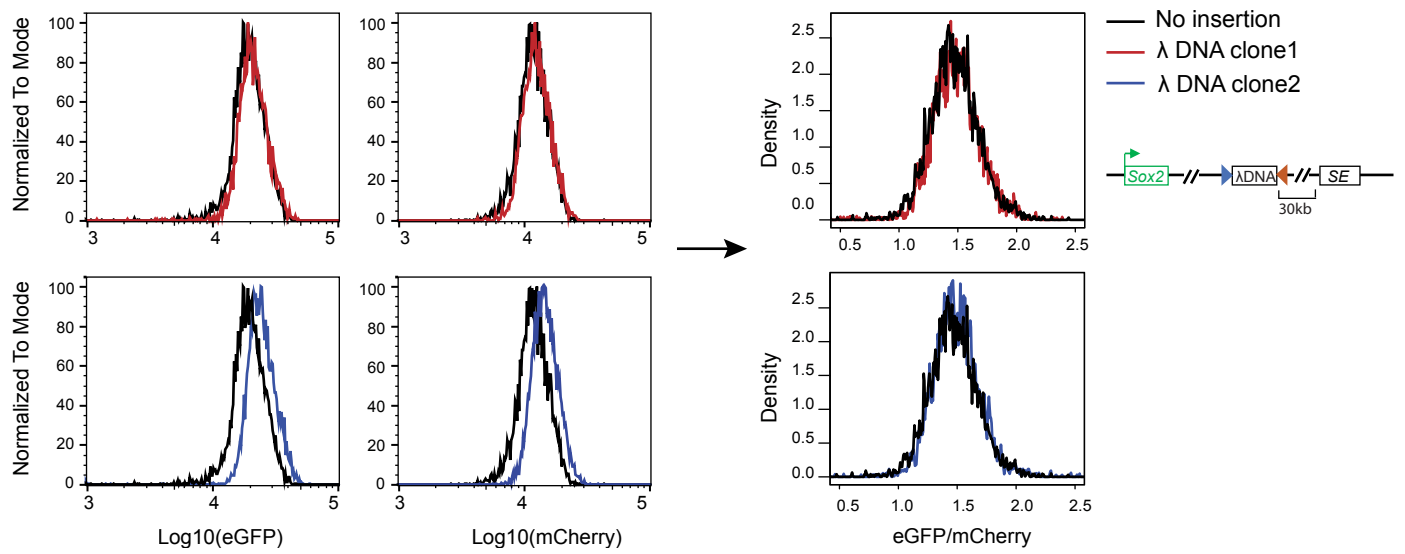

**c**

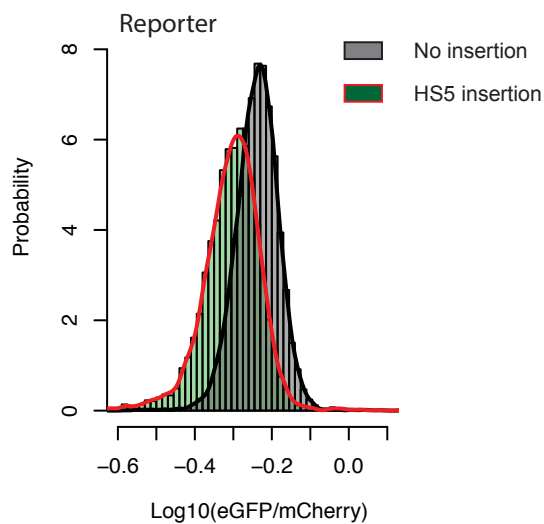

**d**

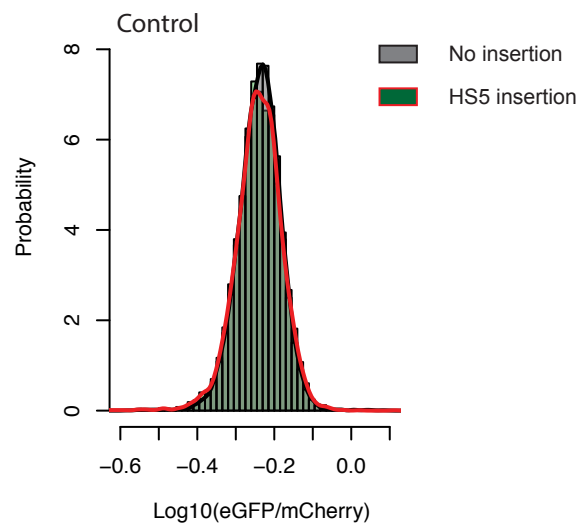

# Extended Data Fig4.

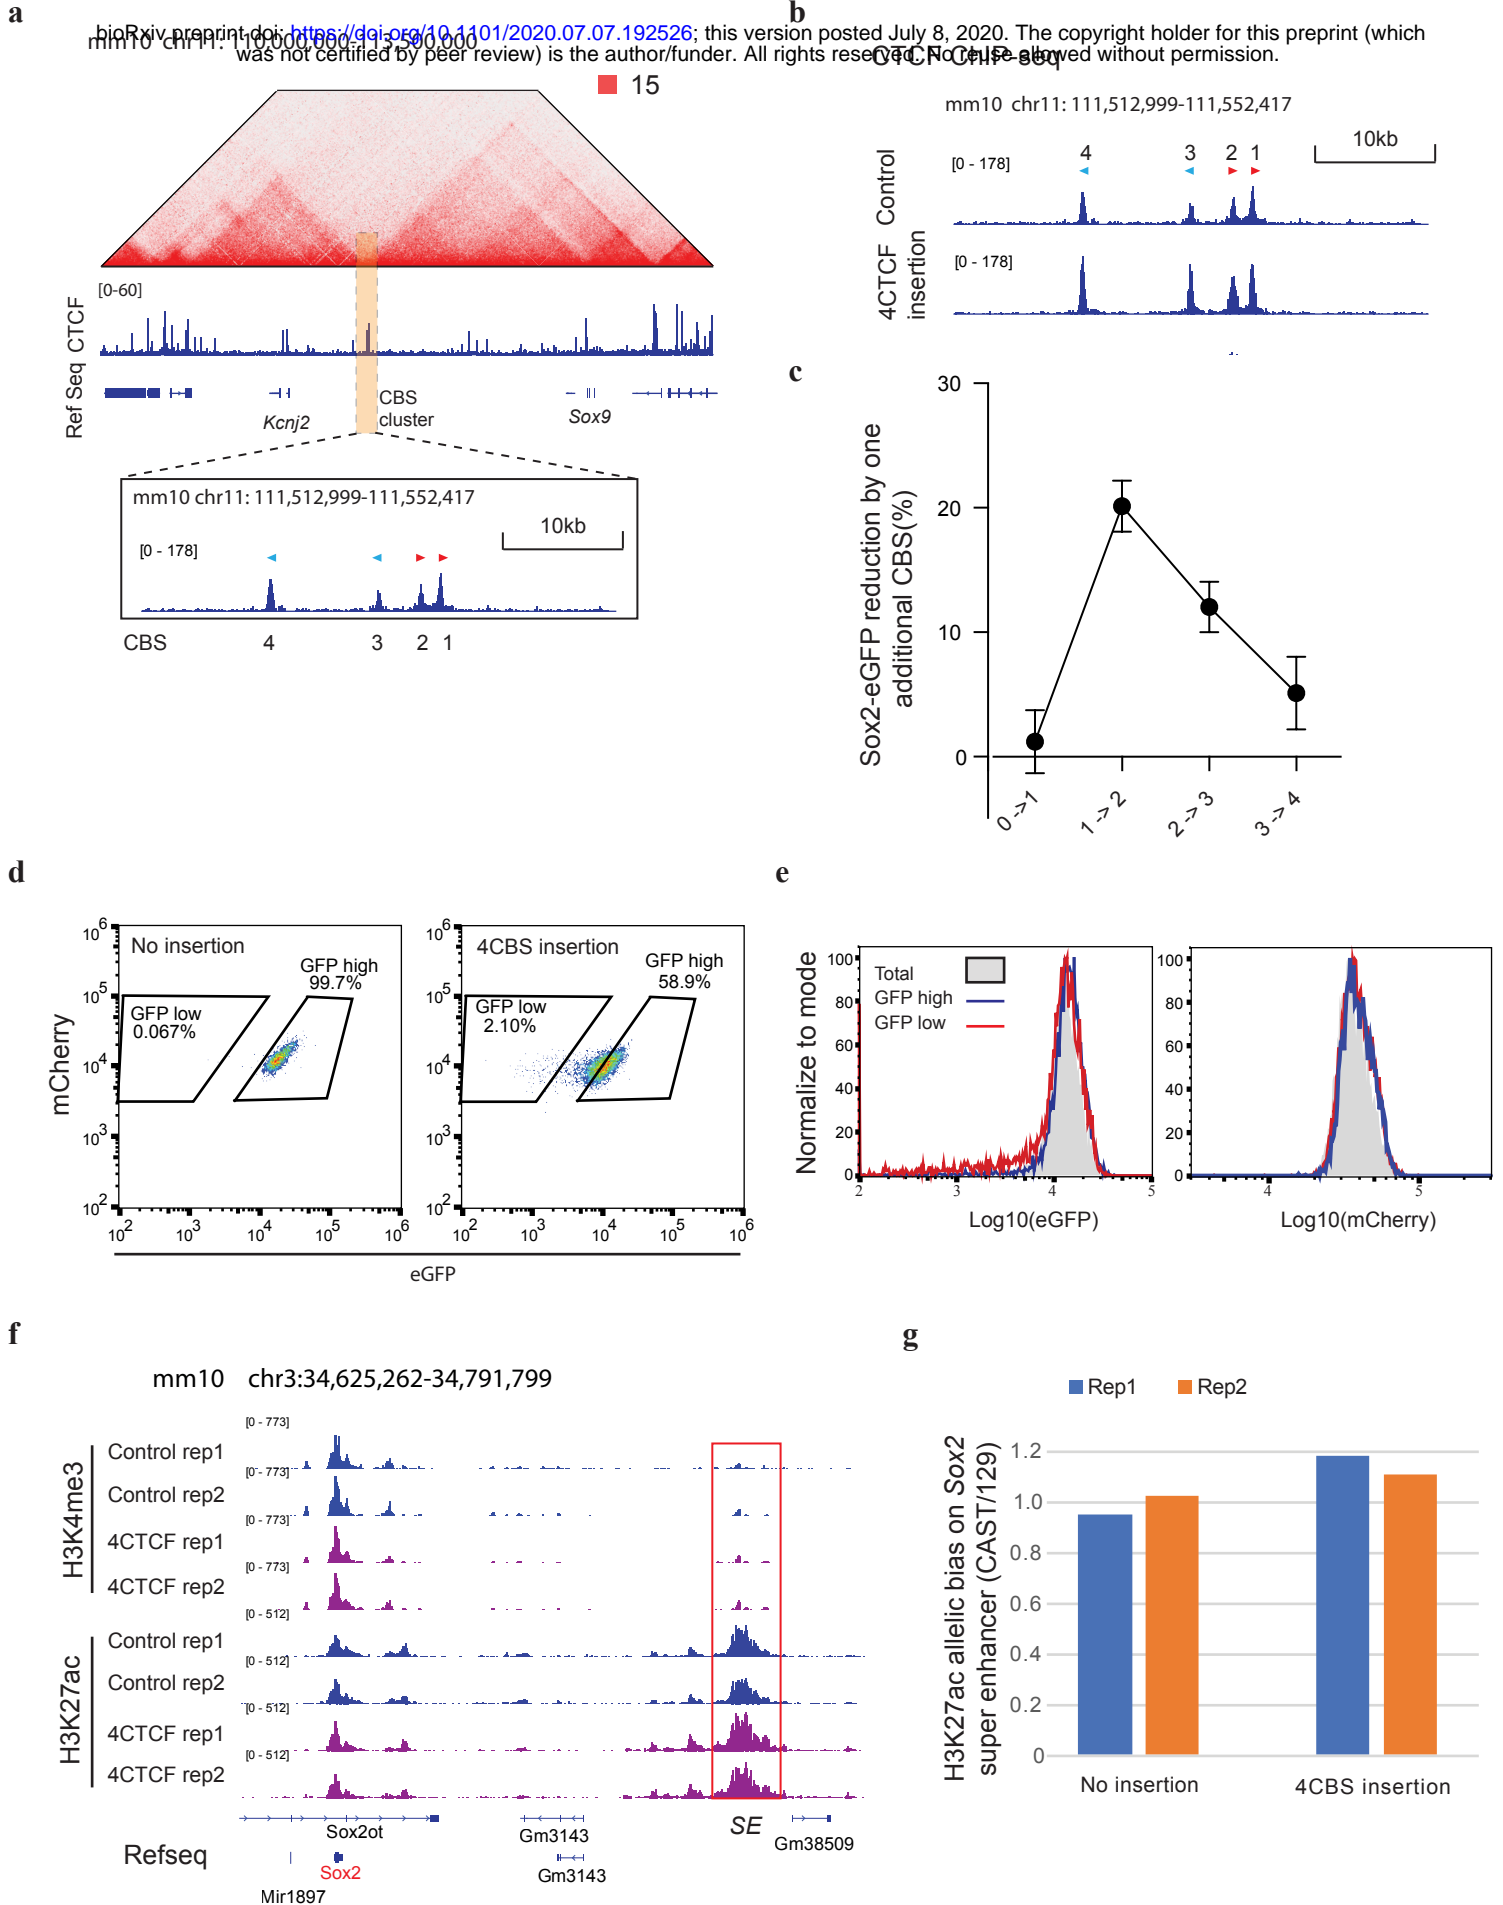

## Extended Data Fig5.

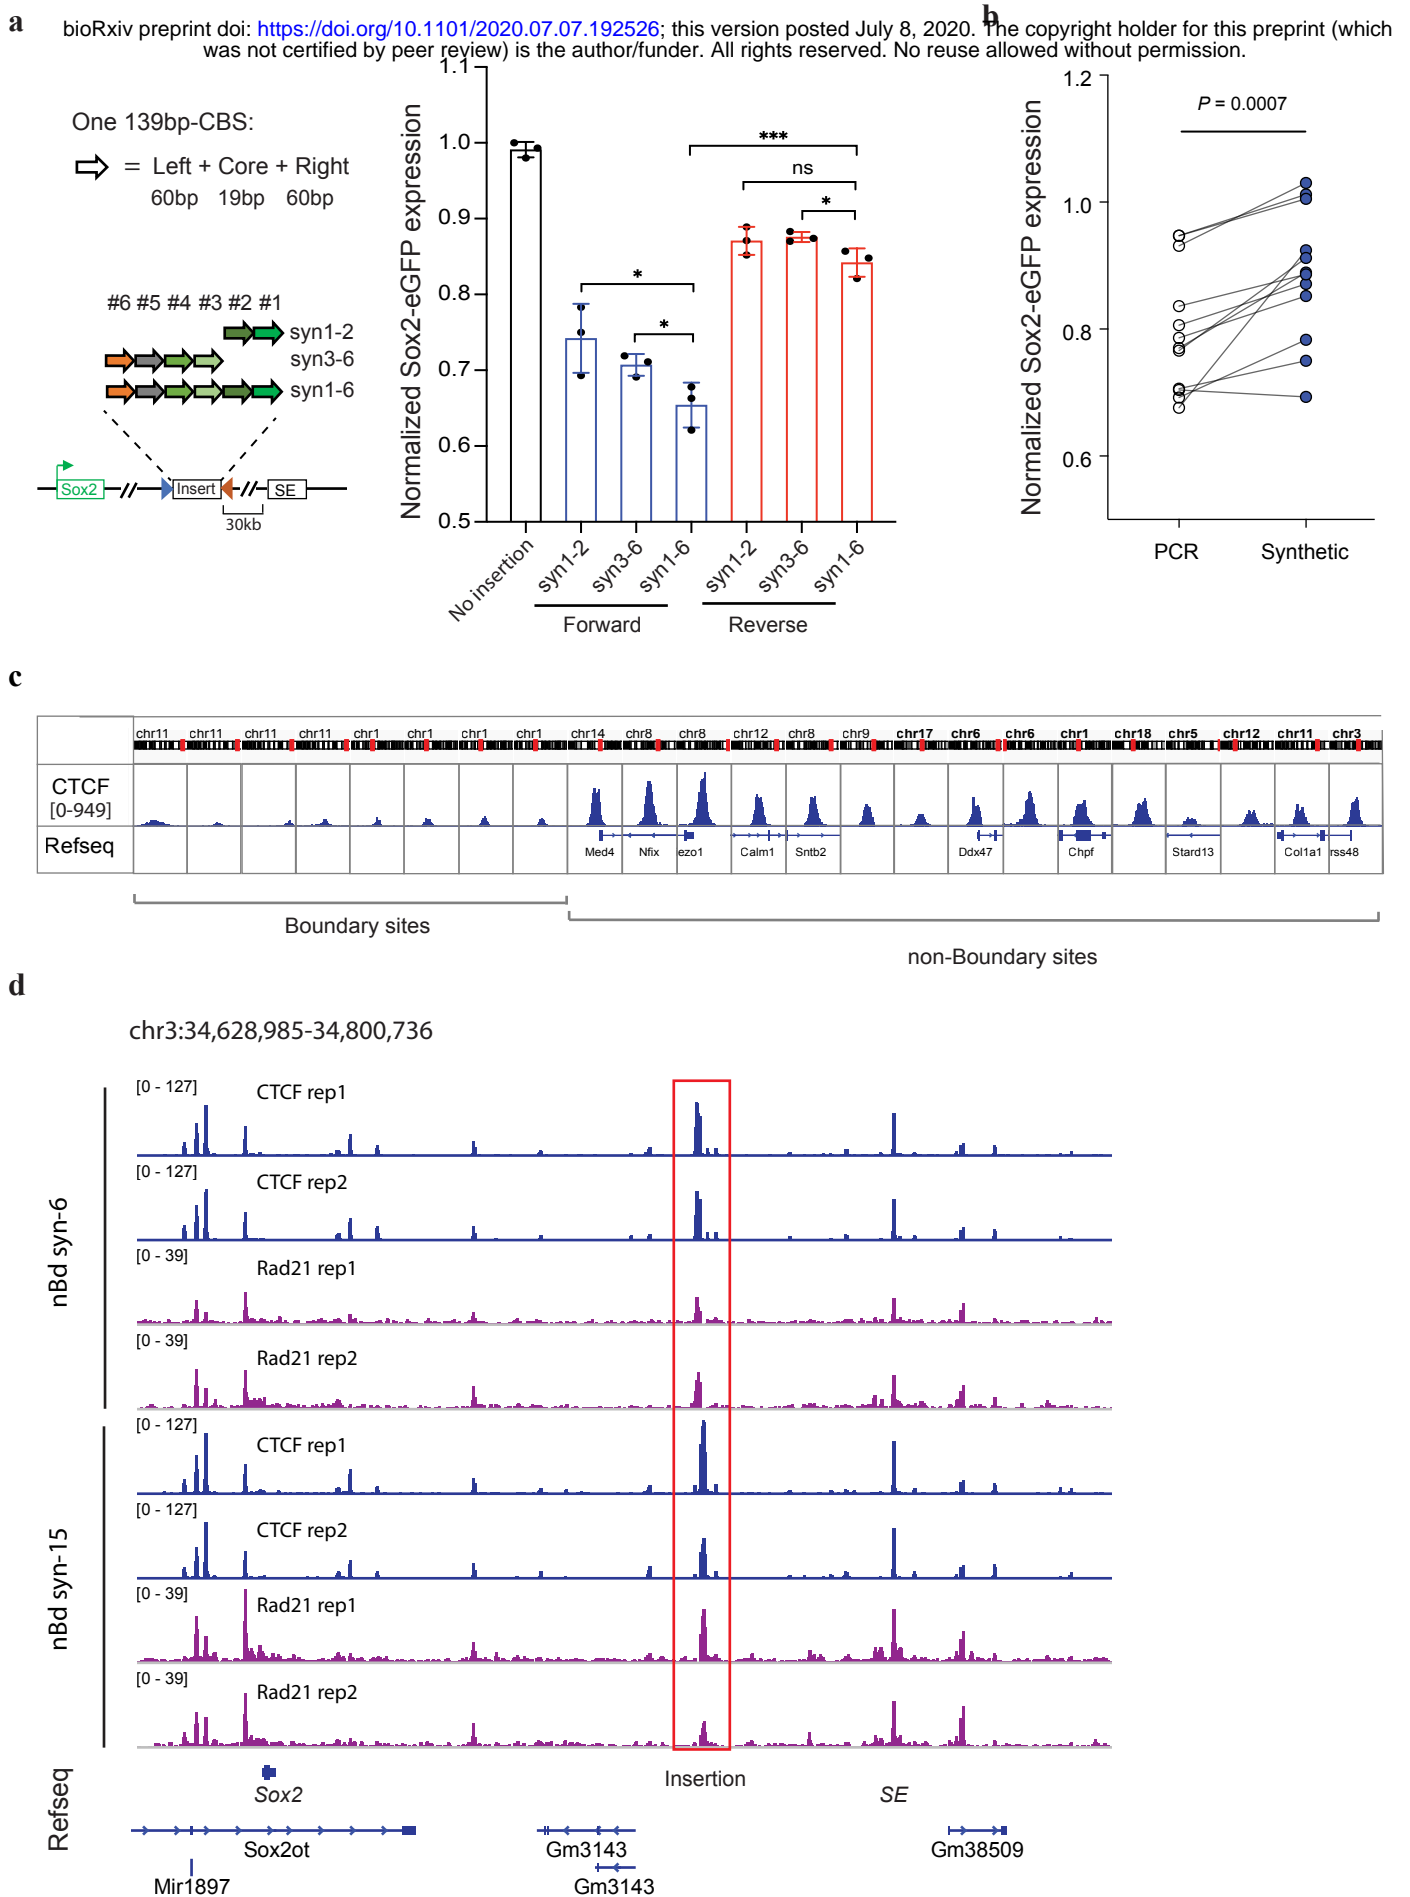

## Extended Data Fig6.

**a** bioRxiv preprint doi: <https://doi.org/10.1101/2020.07.07.192526>; this version posted July 8, 2020. The copyright holder for this preprint (which was not certified by peer review) is the author/funder. All rights reserved. No reuse allowed without permission.

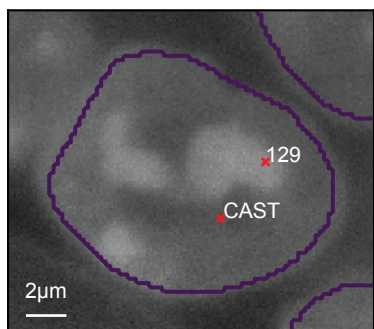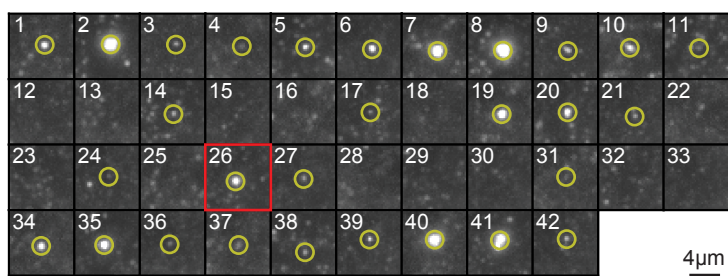

129

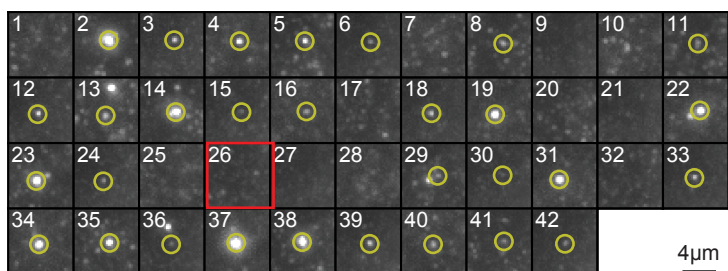

**b**

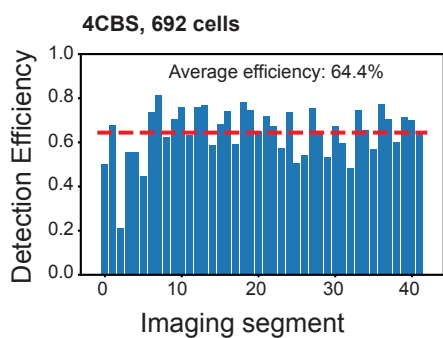

**c**

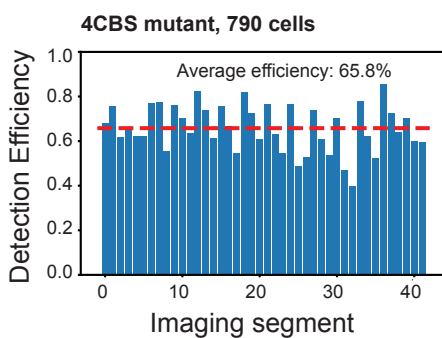

**d**

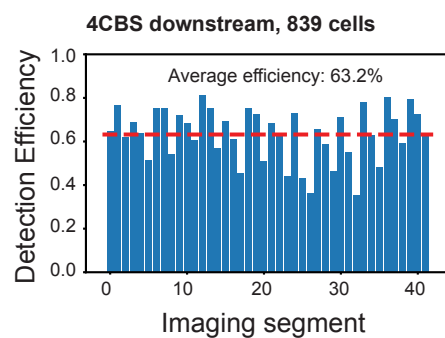

# Extended Data Fig7.

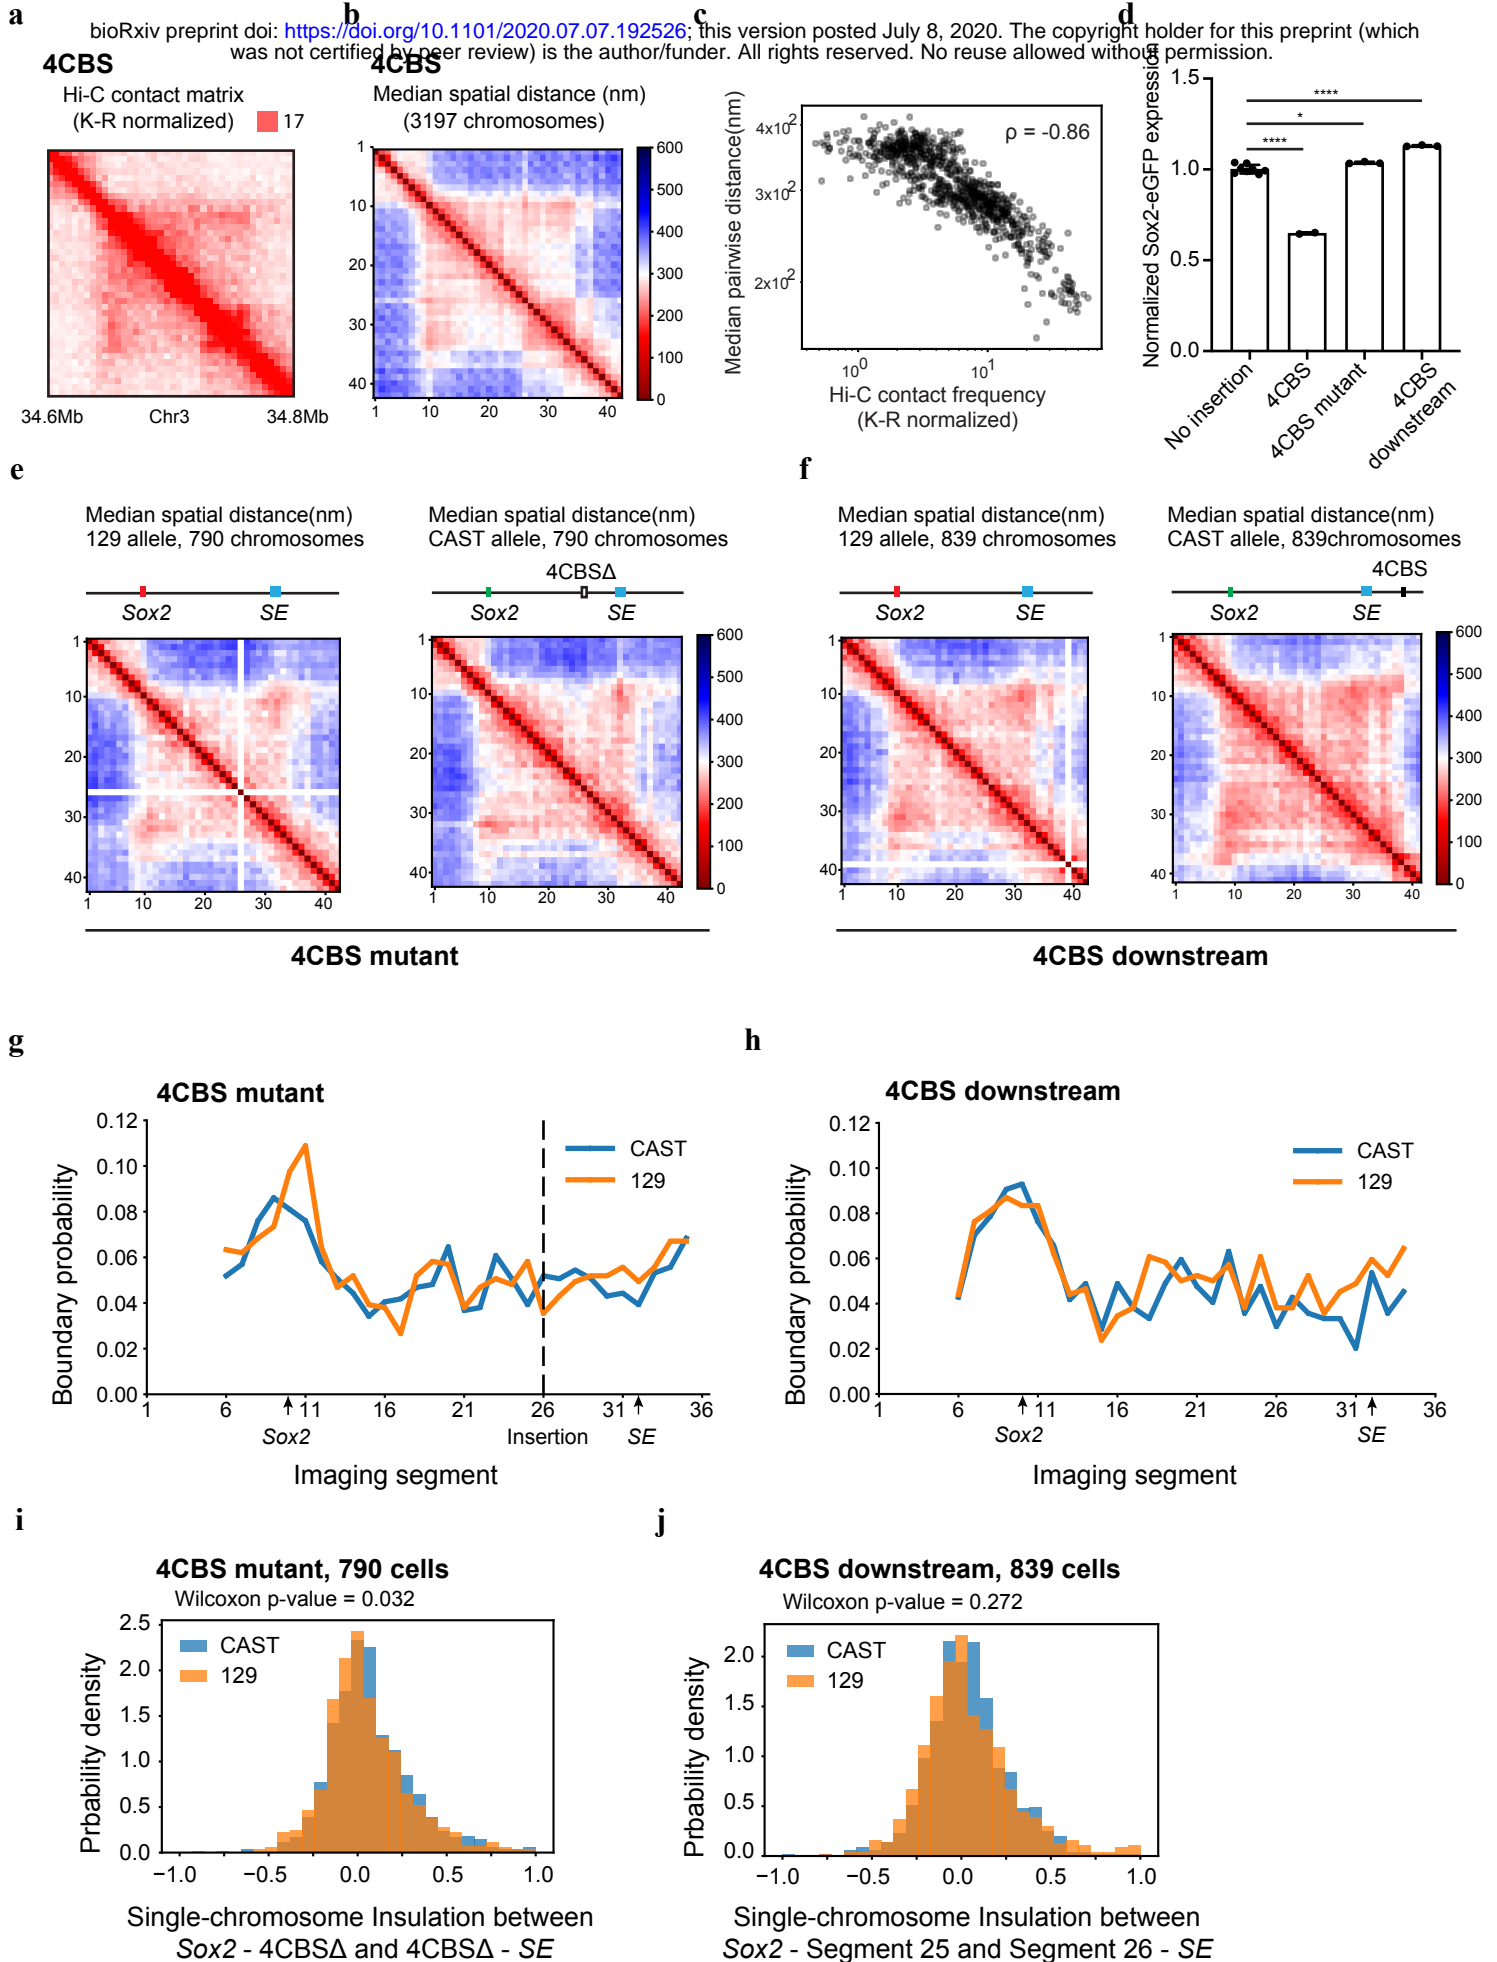

## Extended Data Fig8.

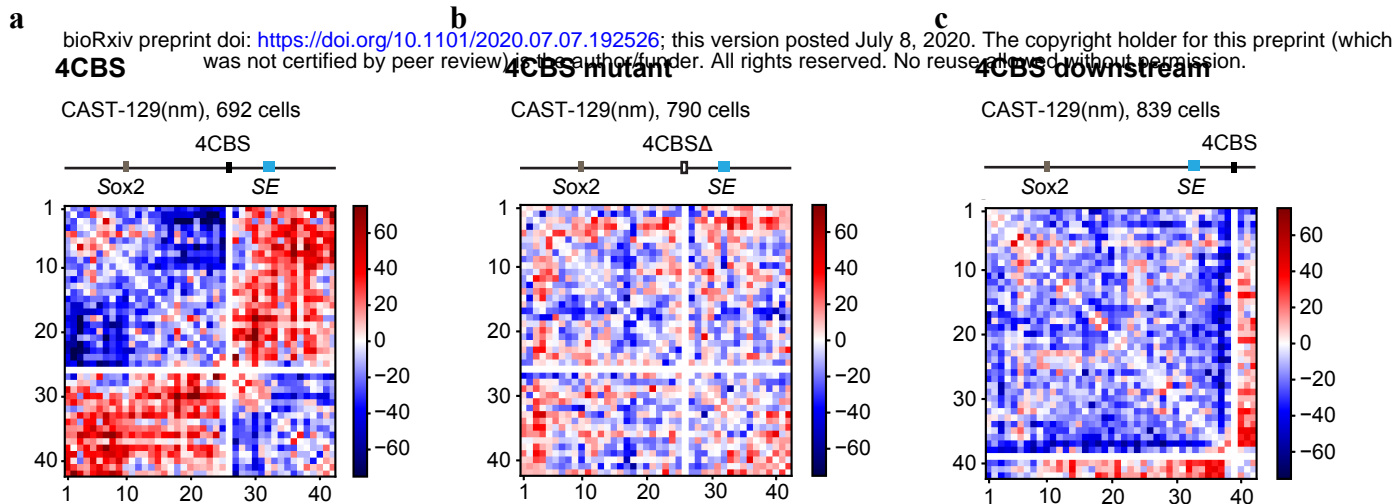

Source: https://www.biorxiv.org/content/10.1101/2020.07.07.192526v1.full.pdf
